# Supplementary material for: Enhanced Pore-C with C-Phasing Enables Chromosomal-Scale, Haplotype-Resolved Assembly of Ultra-Complex Genomes
Source: Research Square preprint supplement (doi:10.21203/rs.3.rs-7343323/v1), 2025-11-06
Supplement: Supplementary file 1 [file 9b3e1a4312fe48ab93abd87a.pdf]

# 1 Supplementary Notes

## 1.1 Supplementary notes of C-Phasing

### 1.1.1 Supplementary module of Hitig

In this section, we describe some auxiliary modules of Hitig that leverage Pore-C or Hi-C contact data to detect both chimeric and high-confidence regions (HCRs).

**Chimeric contigs identification and correction by Pore-C or Hi-C contacts.** We also developed a chimeric contig identification and correction submodule that uses paired contact of intra-contig to calculate the depth in 500 bp window size, similar to existing tools, such as SALSA2[1] or HapHiC[2]. We first filter out the contigs with a length of less than 50 kb and an average depth of less than 10. Furthermore, we use the Mean Squared Error (MSE) to estimate the smoothness of the depth distribution and filter out contigs with  $MSE < 1$ , which are mostly repeats where it is difficult to identify misjoins by contacts.

$$MSE = \frac{1}{n} \sum_{i=0}^{n-1} (y_{i+1} - y_i)^2 \quad (1)$$

where  $n$  is the number of bins in a contig and  $y$  is the depth of the bins.

Then, we used the Polynomial Curve Fitting method to fit the depth distribution with the degree=50 parameter. Finding peaks in the signal area was used to identify the breakpoints of a chimeric and the peak points adjacent to the breakpoints. Peak points were used to ensure that the trough points correspond to breakpoints of the chimeric contigs, and we only retained the trough points whose corresponding values are more significant than two peak pairs  $1.5E$  times, where  $E$  is the value of the distance of the breakpoint to an edge. Meanwhile, to avoid truncating the telomere regions, we filter out the break contigs that enrich the telomere motif, such as "5'-CCCATT" for Human. Finally, to avoid another round of mapping, we convert the contig name and coordinate to the corrected name and coordinate in the Pore-C table and pairs file.

**Identify the HCRs by the depth distribution of Pore-C or Hi-C data.** Moreover, we also support identifying the HCRs by contacts based on Pore-C or Hi-C data, in which we calculate the distribution of all contacts (including MAPQ=0) at 10 kb resolution and normalize the contacts by the count of the restriction enzyme (RE) cut site to avoid bias from the RE. Following the normalization of the distribution of contacts, we used the peak value *Peak* as the primary depth of the contacts and removed the bin that contained contacts greater than  $1.5 * Peak$ . The remaining bins were merged as the HCRs for the subsequent hypergraph filtering step.

### 1.1.2 Methalign: Utilize information from allele-specific 5mC sites to improve the mapping accuracy

The Methalign algorithm comprises a pipeline from reads to corrected alignments. Initially, HiFi reads, produced on the PacBio Revio system, are aligned to contigs using pbmm2 (<https://github.com/PacificBiosciences/pbmm2>, version 1.13.1). These alignments are then sorted by coordinate with SAMtools (version 1.19.2). The commands for these procedures are as follows:

```
$ pbmm2 index --preset CCS contigs.fasta index.mmi
$ pbmm2 align --preset CCS index.mmi <HiFi_reads.bam | samtools view - -b -o
  HiFi.align.bam
$ samtools sort HiFi.align.bam -o HiFi.align.sorted.bam
$ samtools index HiFi.align.sorted.bam
```

Following this, 5mC sites on each contig are identified using pb-CpG-tools (<https://github.com/PacificBiosciences/pb-CpG-tools>, version 2.3.2) and recorded in a BED file named ‘aligned\_bam\_to\_cpg\_scores.combined.bed’:

```
$ aligned_bam_to_cpg_scores --bam HiFi.align.sorted.bam --ref contigs.fasta --
  model pileup_calling_model.v1.tflite --modsites-mode reference
```

For ONT reads, the dorado basecaller (<https://github.com/nanoporetech/dorado>, version 0.3.2) identifies methylated CpGs during the base calling process:

```
$ dorado basecaller dna_r10.4.1_e8.2_400bps_sup@v3.5.2 pod5_dir --min-qscore 10
  --modified-bases 5mCG --device cuda:auto
```

These reads are then aligned to contigs using the dorado aligner (version 0.5.2+7969fab):

```
$ dorado aligner contigs.fasta ont_reads.bam --mm2-opts "--secondary=yes" > ont
  .align.bam
```

Finally, the custom script ‘filter\_bam\_methyl.py’ generates the final BAM file:

```
$ filter_bam_methyl.py contigs.fasta aligned_bam_to_cpg_scores.combined.bed ont
  .align.bam --penalty penalty
```

Each of the corresponding primary and supplementary alignments is found for each secondary alignment based on their positions on ONT reads. The number of inconsistent 5mC sites between the Pore-C read and the contig in each alignment is counted to adjust the alignment score using a specified penalty with the formula:

$$AS_{adj} = AS_{raw} - N \times P \quad (2)$$

In this formula,  $AS_{raw}$  and  $AS_{adj}$  represent the raw alignment score calculated by the dorado aligner and the adjusted alignment score, respectively.  $N$  denotes the number of inconsistent 5mC modified sites, and  $P$  is the specified penalty. If an updated alignment score of a secondary alignment exceeds that of the corresponding primary or supplementary alignment, their alignment types are swapped. The MAPQ of this alignment is then assigned a higher value to prevent it from being filtered out in subsequent analyses.

### 1.1.3 Rename: Rename chromosome according to a reference genome

To facilitate a comparative analysis of assemblies generated by different scaffolding software, we implemented a scaffold renaming function based on homology alignment with a closely related diploid reference genome. The workflow proceeds as follows:

(1) Contigs alignment: The contigs were aligned to the reference genome using wfmash (v0.17.0-0-g78bff59, <https://github.com/waveygang/wfmash>) with “-m -s 50k -l 250k -p 90” parameters.

(2) Chromosomal assignment. For each scaffold, we calculated the cumulative matches of alignments against individual reference chromosomes. The reference chromosome with the maximum aggregate matches was selected to rename the scaffold and reorient it as step (3).



(3) Scaffold reorientation. We calculated the orientation score  $SO$  of each scaffold using the formula:

$$SO = \sum_{i,r} O_{ri} M_{ri} O_i \quad (3)$$

where  $SO$  quantifies the concordance between the scaffold and the reference chromosome. If  $SO < 0$ , it indicates an opposite orientation, and the entire orientation of the scaffold is reversed. The  $O_{ri}$  represents the direction between contig  $i$  and its matched regions. The  $O_{ri}$  is set to -1 if contig  $i$  is aligned in the opposite direction than the reference and 1 if it is aligned in the same direction. The  $M_{ri}$  represents the number of matches between contig  $i$  and the reference chromosome. The  $O_i$  represents the contig  $i$  orientation on the scaffold; it is set to -1 if it is oriented in the opposite direction than the source contig on the scaffold, and 1 if it is oriented in the same direction.

## 1.2 Simulation of polyploid genomes and corresponding Pore-C, Hi-C and ONT ultra-long data

### 1.2.1 Simulation of Pseudo-genomes

To benchmark the performance of our chimeric contig correction and haplotype phasing algorithms, we simulated five pseudo-polyploid genomes at different ploidy (2, 4, 6, 8, 12). Supplementary Table 8 shows that we download 12 accessions *Arabidopsis* variants information from 1001 Genome Projects[3] and their reference TAIR10 genome from TAIR (<https://www.arabidopsis.org/>).

And then, we used “BCFtools consensus” to generate pseudo-genomes:

```
$ bcftools consensus -f tair10.fasta sample.vcf.gz > sample.pseudo.fasta
```

To simulate pseudo-polyploid genomes at different ploidy levels, we merged the pseudo-genome data, as shown in Supplementary Table 1. Finally, we simulated contigs at different contig N50 (50 kb, 100 kb, 500 kb, 1 Mb and 2 Mb).

```
$ python CPhasing/scripts/simulation/simuCTG.py -n n50 -i ploidy.pseudo.fasta -o
output.contig.fasta
```

### 1.2.2 Simulation of Pore-C data

To simulate Pore-C data for the pseudo-genomes, we first downloaded the Pore-C data of the *A. thaliana* Col-0 variant from the Genome Sequence Archive (GSA; CRA0051051) and aligned it to the TAIR10 reference genome. Low-quality alignments (mapping quality  $\leq 1$ ) were filtered out using the “cphasing-rs paf2porec”, followed by the removal of inter-chromosomal contacts (Supplementary Figure 7):

```
$ python ~/code/CPhasing/scripts/simulation/remove_inter_contact.py sample.porec.gz
```

We then projected the alignments onto different accessions by incorporating their respective variant information, enabling the reconstruction of simulated Pore-C reads that reflect haplotype-specific contacts, with contact fragments grouped and ligated according to read IDs.

```
$ cphasing-rs simulator porec tair10.fasta ${sample}.vcf.gz sample.porec.DpnII.bed -
o ${sample}.porec.fasta
```

To realistically mimic ONT sequencing characteristics, we introduced sequencing errors using PBSIM3[4] with the ERRHMM-ONT model.

```
$ pbsim --strategy templ --template sample.porec.fasta --method errhmm --errhmm data/ERRHMM-ONT.model --prefix output --accuracy-mean 0.95
```

### 1.2.3 Simulation of Hi-C data

Following a procedure analogous to the Pore-C simulation, we downloaded Hi-C data for the *Arabidopsis thaliana* Col-0 variant from NCBI BioSample (SRR2626163) and aligned it to the TAIR10 reference genome. After removing low-quality alignments ( $\text{MAPQ} < 1$ ) using samtools view -q 1, we converted the alignments to other accessions using their variant profiles and excluded all inter-chromosomal read pairs.

```
$ cphasing-rs simulator hic tair10.fasta ${sample}.vcf.gz -o ${sample}
```

To ensure consistency, we downsampled the simulated paired-end reads to 50× coverage, matching the conditions of the Pore-C simulation.

### 1.2.4 Simulation of Ultra-long ONT data

To assess the performance of hitig, we simulated approximately 30x ultra-long data across different ploidy levels using assemblies with a contig N50 of 500 kb.

```
$ pbsim --strategy wgs --genome ploidy.fasta --depth 30 --length-mean 800000 --length-sd 800000 --accuracy-mean 0.95 --method errhmm --errhmm ~/software/pbsim3-3.0.0/data/ERRHMM-ONT.model --prefix ploidy.ul.fastq
```

### 1.2.5 Simulation of chimeric contigs

We simulated two types of chimeric errors, namely, intra-chromosomal and inter-chromosomal switches. To identify homologous regions, we performed self-alignment of the contig-level assembly using minimap2 [5] with the parameters “-DP -k19 -w19 -m200”. Subsequently, approximately 20% of chimeric contigs were introduced using the following script:

```
$ simulate_chimeric.py ploidy-${ploidy_level}.500k.fasta --chimeric_ratio 0.2 > chimeric.fasta
```

## 1.3 Performance of C-Phasing on monoploid genome scaffolding

In this section, we demonstrate the ability of C-Phasing to scaffold monoploids based on the Hyperpartition (basal) algorithm. We collected the public Pore-C data of rice (*Oryza sativa* Azucena, SRR13985193) and its chromosome-level assembly (GCA\_009830595.1), breaking the chromosomes to simulate contig-level assembly at different contig N50 (100 kb, 500 kb, 1 Mb, 2 Mb, and 5 Mb).

```
$ cphasing pipeline -f sample.contigs.fasta -pct sample.porec.gz -n group_number --mode basal
```

We then utilized these assemblies to benchmark the performance of our algorithm in monoploid scaffolding. As shown in Supplementary Table 6, Hyperpartition in its basal mode consistently achieved the highest contiguity across various contig lengths compared to other tools. Furthermore, it produced fewer interchromosomal misassemblies, demonstrating superior accuracy and robustness in monoploid genome reconstruction.

Furthermore, we assessed the performance of Hyperpartition (basal mode) on real datasets from *Metrosideros polymorpha* (PRJNA670777)[6] and *Gossypium hirsutum* (PRJNA824233)[7]. For this evaluation, the assemblies were fragmented at gap regions, and publicly available Pore-C data were used to guide the scaffolding process. As shown in Supplementary Table 7, Hyperpartition achieved the highest contiguity and anchor rate for *M. polymorpha* and *G. hirsutum*, demonstrating its effectiveness on real-world genomes. Overall, our Hyperpartition algorithm in basal mode outperforms existing tools, demonstrating robust performance in scaffolding both monoploid and allopolyploid genomes.

## 1.4 Detail commands of comparison with existing software

To evaluate our algorithm, we compared it with existing tools.

### 1.4.1 Chimeric contigs identification and correction on simulated data

#### a. C-Phasing

```
$ hitig pipeline -f chimeric.fasta -i ul.fastq.gz -n ploidy_level -t 20
```

#### b. CRAQ

```
$ craq -g chimeric.fasta -sms ul.fastq.gz -b T -t 20 -x map-ont
```

#### c. tigmint

```
$ tigmint-make tigmint-long draft=chimeric reads=ul dist=auto G=genome_sizes t=20
```

#### d. GAEP

```
$ gaep bkp -r chimeric.fasta -i ul.fastq.gz -t 20 -x ont
```

### 1.4.2 Polyploid phasing and scaffolding on simulated polyploids

#### a. C-Phasing

```
$ cphasing pipeline -f sample.contigs.fasta -prs sample.pairs.gz -n  
homo_group_number:ploidy_level -t 10 -x nofilter
```

#### b. HapHiC

```
$ haphic pipeline sample.contigs.fasta sample.bam group_number --  
remove_allelic_links ploidy_level --processes 10
```

#### c. ALLHiC

```
$ gmap_build -D . -db DB sample.contigs.fasta  
$ gmap -d DB -D . -f 2 -n ploidy_level -t 10 monoploid.cds > gmap.gff3  
$ gmap2AlleleTableBED.pl monoploid.bed  
$ ALLHiC-prune -i Allele.ctg.table -b sample.bam
```

```
$ allhic extract prunning.bam sample.contigs.fasta --RE enzyme_site
$ allhic partition prunning.counts_enzyme_site.txt prunning.pairs.txt
  group_numbers --minREs 25
$ for txt in *.counts_enzyme_site.group_number.g*.txt; do
  echo "allhic optimize $txt prunning.clm"
done | parallel -j 10
```

### 1.4.3 Polyploid phasing and scaffolding on real polyploid data

To further evaluate the performance of our pipeline compared to HapHiC, we processed the Hi-C data following the instructions provided in their respective tutorials. For polyploid datasets, C-Phasing was executed with “-hcr -p AAGCTT -t 10” across all samples, and with “-disable-merge-in-first -refine” specifically for sweet potato assemblies, and with “-n 0:0 -x very-sensitive” specifically for cultivated sugarcane ZZ01.

## 1.5 Performance of C-Phasing pipeline on polyploidy phasing scaffolding

We evaluated the C-Phasing pipeline (default using the Align module for Pore-C) on a ‘synthetic’ dodecaploid genome with contig N50 values of 500 kb and 2 Mb. Using Hi-C data, C-Phasing achieved strong concordance with the reference (median Spearman’s  $\rho = 1.00$  and  $1.00$ , respectively), greater than HapHiC (median  $\rho = 0.97$  and  $0.98$ ) and markedly outperforming ALLHiC (median  $\rho = 0.83$  and  $0.88$ ) (Supplementary Fig. 12). Notably, with Pore-C data, C-Phasing’s performance further improved, achieving near-perfect phasing and scaffolding ( $\rho = 1.00$  at 500 kb;  $1.00$  at 2 Mb), despite structural artifacts such as misorientation between the two arms of chromosome 1. These results underscore C-Phasing’s robustness and accuracy in assembling ultra-complex polyploid genomes at haplotype resolution.

## References

- [1] Jay Ghurye, Arang Rhie, Brian P. Walenz, Anthony Schmitt, Siddarth Selvaraj, Mihai Pop, Adam M. Phillippy, and Sergey Koren. Integrating Hi-C links with assembly graphs for chromosome-scale assembly. *PLOS Computational Biology*, 15(8):e1007273, August 2019.
- [2] Xiaofei Zeng, Zili Yi, Xingtian Zhang, Yuhui Du, Yu Li, Zhiqing Zhou, Sijie Chen, Huijie Zhao, Sai Yang, Yibin Wang, and Guoan Chen. Chromosome-level scaffolding of haplotype-resolved assemblies using Hi-C data without reference genomes. *Nature Plants*, pages 1–17, August 2024.
- [3] Carlos Alonso-Blanco, Jorge Andrade, Claude Becker, Felix Bemm, Joy Bergelson, Karsten M. Borgwardt, Jun Cao, Eunyoung Chae, Todd M. Dezwaan, Wei Ding, Joseph R. Ecker, Moises Exposito-Alonso, Ashley Farlow, Joffrey Fitz, Xiangchao Gan, Dominik G. Grimm, Angela M. Hancock, Stefan R. Henz, Svante Holm, Matthew Horton, Mike Jarsulic, Randall A. Kerstetter, Arthur Korte, Pamela Korte, Christa Lanz, Cheng-Ruei Lee, Dazhe Meng, Todd P. Michael, Richard Mott, Ni Wayan Mulyati, Thomas Nägele, Matthias Nagler, Viktoria Nizhynska, Magnus Nordborg, Polina Yu Novikova, F. Xavier Picó, Alexander Platzer, Fernando A. Rabanal, Alex Rodriguez, Beth A. Rowan, Patrice A. Salomé, Karl J. Schmid, Robert J. Schmitz, Ümit Seren, Felice Gianluca Sperone, Mitchell Sudkamp, Hannes Svardal, Matt M. Tanzer, Donald Todd,

- Samuel L. Volchenboun, Congmao Wang, George Wang, Xi Wang, Wolfram Weckwerth, Detlef Weigel, and Xuefeng Zhou. 1,135 Genomes Reveal the Global Pattern of Polymorphism in *Arabidopsis thaliana*. *Cell*, 166(2):481–491, July 2016. Publisher: Elsevier.
- [4] Yukiteru Ono, Michiaki Hamada, and Kiyoshi Asai. PBSIM3: a simulator for all types of PacBio and ONT long reads. *NAR Genomics and Bioinformatics*, 4(4):lqac092, 12 2022.
- [5] Heng Li. Minimap2: Pairwise alignment for nucleotide sequences. *Bioinformatics*, 34(18):3094–3100, September 2018.
- [6] Jae Young Choi, Xiaoguang Dai, Ornob Alam, Julie Z. Peng, Priyesh Rughani, Scott Hickey, Eoghan Harrington, Sissel Juul, Julien F. Ayroles, Michael D. Purugganan, and Elizabeth A. Stacy. Ancestral polymorphisms shape the adaptive radiation of *Metrosideros* across the Hawaiian Islands. *Proceedings of the National Academy of Sciences*, 118(37):e2023801118, September 2021.
- [7] Xianhui Huang, Xuehan Tian, Liuling Pei, Xuanxuan Luo, Yuqi Zhang, Xingtian Zhang, Xianlong Zhang, Longfu Zhu, and Maojun Wang. Multi-omics mapping of chromatin interaction resolves the fine hierarchy of 3D genome in allotetraploid cotton. *Plant Biotechnology Journal*, 20(9):1639–1641, 2022.

## 2 Supplementary Tables

**Supplementary Table 1** | Statistics of the Hi-C mapping and their coverage

| Items   |                                          | <i>Sorghum bicolor</i> |                | <i>Saccharum spontaneum</i> |                | <i>Saccharum officinarum</i> L. |                | <i>Saccharum</i> hybrid cultivar POJ2878 <sup>1</sup> |                |
|---------|------------------------------------------|------------------------|----------------|-----------------------------|----------------|---------------------------------|----------------|-------------------------------------------------------|----------------|
|         |                                          | Number                 | Percentage (%) | Number                      | Percentage (%) | Number                          | Percentage (%) | Number                                                | Percentage (%) |
| Mapping | Sequencing reads                         | 161,155,460            | 100            | 639,213,589                 | 100            | 1,329,647,044                   | 100            | 4,191,942,972                                         | 100            |
|         | unique                                   | 79,842,347             | 49.54          | 133,671,824                 | 20.91          | 110,702,433                     | 8.36           | 332,133,293                                           | 7.92           |
|         | valid reads deduped                      | 70,861,426             | 43.97          | 128,086,634                 | 20.04          | 109,095,283                     | 8.2            | 301,956,362                                           | 7.2            |
|         | trans links                              | 47,398,395             | 29.41          | 83,822,929                  | 13.11          | 75,969,043                      | 5.71           | 160,565,351                                           | 3.83           |
|         | invalid reads                            | 81,313,113             | 50.46          | 505,541,765                 | 79.09          | 1,218,944,611                   | 91.67          | 3,859,809,679                                         | 92.07          |
|         | # of contigs                             | 4,941                  |                | 11,009                      |                | 28,905                          |                | 27,331                                                |                |
|         | contig N50 (kb)                          | 1,179.13               |                | 1,781.63                    |                | 2,943.09                        |                | 6,418.52                                              |                |
|         | Size of contigs (Mb)                     | 698.54                 |                | 3,192.30                    |                | 7,322.72                        |                | 10,109.42                                             |                |
|         |                                          | Number                 | Percentage (%) | Number                      | Percentage (%) | Number                          | Percentage (%) | Number                                                | Percentage (%) |
| Contigs | Contigs covered by valid RE <sup>2</sup> | 2,012                  | 40.72          | 2,595                       | 23.57          | 1,897                           | 6.56           | 1,335                                                 | 4.88           |
|         | Size of contigs covered by valid RE (Mb) | 640.3                  | 91.66          | 2,908.05                    | 91.09          | 5,055.45                        | 69.03          | 6,577.37                                              | 65.06          |

<sup>1</sup> The POJ2878 genome is a contig-level assembly generated using HiFi and ultra-long (UL) reads by hifiasm, with an ultra-long read N50 that differs from the ultra-long read length distribution reported in our separate study of the POJ2878 genome.

<sup>2</sup> We define a valid restriction enzyme (RE) site as one with at least three inter-contig links within a  $\pm 500$  bp window of the site. Only contigs containing at least 25 valid RE sites were valid for subsequent accuracy clustering.

**Supplementary Table 2** | Statistics of the assemblies by different assemblers

| Sample       | Software            | # of contigs | Length (Gb) | N50 (Mb) | Chimeric error | Erroneous | Duplicated | Haplotig | Collapsed |
|--------------|---------------------|--------------|-------------|----------|----------------|-----------|------------|----------|-----------|
| alfalfa      | hicanu (HiFi-only)  | 22,876       | 3.65        | 1.90     | 0.77%          | 7.41%     | 12.58%     | 77.34%   | 2.67%     |
|              | verkko (HiFi-UL)    | 19,040       | 3.32        | 1.93     | 0.26%          | 1.78%     | 10.79%     | 84.54%   | 2.89%     |
|              | hifiasm (HiFi-only) | 24,042       | 3.54        | 1.24     | 0.11%          | 1.38%     | 17.24%     | 79.37%   | 2.01%     |
|              | hifiasm (HiFi-UL)   | 6,312        | 3.18        | 4.28     | 0.13%          | 1.07%     | 9.60%      | 86.49%   | 2.84%     |
| Sweet potato | hicanu (HiFi-only)  | 26,703       | 3.29        | 2.37     | 1.20%          | 8.64%     | 6.88%      | 80.80%   | 3.68%     |
|              | verkko (HiFi-UL)    | 12,100       | 2.92        | 5.94     | 0.28%          | 1.04%     | 3.62%      | 92.29%   | 3.05%     |
|              | hifiasm (HiFi-only) | 33,502       | 3.30        | 1.13     | 0.11%          | 0.82%     | 13.52%     | 83.17%   | 2.49%     |
|              | hifiasm (HiFi-UL)   | 11,041       | 2.87        | 3.24     | 0.14%          | 0.34%     | 4.08%      | 92.73%   | 2.85%     |
| POJ2878      | hicanu (HiFi-only)  | 31,273       | 8.79        | 8.16     | 2.37%          | 0.59%     | 2.14%      | 80.43%   | 16.83%    |
|              | verkko (HiFi-UL)    | 49,868       | 10.79       | 3.06     | 0.39%          | 0.94%     | 6.00%      | 88.06%   | 5.00%     |
|              | hifiasm (HiFi-only) | 140,205      | 12.28       | 0.35     | 0.23%          | 0.34%     | 15.51%     | 79.86%   | 4.29%     |
|              | hifiasm (HiFi-UL)   | 27,853       | 10.13       | 6.33     | 0.25%          | 0.12%     | 3.25%      | 90.79%   | 5.84%     |

**Note:** The HiFi reads for sweet potato in this analysis were generated using the PacBio Sequel platform, differing from those used in our downstream contig-level assemblies for benchmarking. Additionally, the ultra-long read N50 for the POJ2878 dataset was approximately 100 kb, which differs from the ultra-long read distributions reported in our separate study of POJ2878.

**Supplementary Table 3** | The sequencing output and cost of ePore-C

| Source                                 | Accession              | Sample       | Enzyme       | Platform   | ONT chip | Read count (M) | Yield (Gb) | Read N50 (kb) | Pairwise contacts (M) | Yield pairwise contacts per Gb (M) | Singleton (%) | Cost* (\$) | Cost (\$) / Gb | Cost (\$) / # of pairwise contacts (M) |       |       |
|----------------------------------------|------------------------|--------------|--------------|------------|----------|----------------|------------|---------------|-----------------------|------------------------------------|---------------|------------|----------------|----------------------------------------|-------|-------|
| Li, Z. et al., 2022                    | Col-0                  | Rep 1        | DpnII        | MinION     | R9.4.1   | 3.50           | 7.91       | 3.01          | 9.22                  | 1.17                               | 27.93         | 791        | 100.00         | 85.83                                  |       |       |
|                                        |                        | Rep 2        |              |            |          | 6.45           | 11.69      | 2.65          | 18.41                 | 1.57                               | 25.33         | 1,169      | 100.00         | 63.51                                  |       |       |
| Huang, X, et al., 2022                 | TM-1                   | TM-1_part1   |              | 36.08      |          | 61.25          | 3.05       | 63.98         | 1.04                  | 43.67                              | 1,268         | 20.70      | 19.82          |                                        |       |       |
|                                        |                        | TM-1_part2   |              | 36.08      |          | 51.99          | 2.24       | 42.46         | 0.82                  | 51.71                              | 1268          | 24.39      | 29.86          |                                        |       |       |
| Serra Mari, R, et al., 2024            | Altus                  | Altus-202304 |              |            |          | 14.72          | 24.54      | 2.35          | 2.65                  | 0.11                               | 77.13         | 1268       | 51.67          | 478.28                                 |       |       |
|                                        |                        | Altus-202308 |              |            |          | 59.28          | 33.17      | 0.63          | 14.96                 | 0.45                               | 58.14         | 1,268      | 38.23          | 84.73                                  |       |       |
| Data generated in this study (ePore-C) | Col-0                  | AT-1         | DpnII        | PromethION | R10.4.1  | 5.55           | 14.45      | 3.45          | 49.80                 | 3.45                               | 11.38         | 566        | 20.41          | 6.44                                   |       |       |
|                                        |                        | AT-2         |              |            |          | 5.22           | 13.29      | 3.30          | 38.14                 | 2.87                               | 15.74         |            |                |                                        |       |       |
|                                        | 1393                   | SP-1         | 25.80        |            |          | 110.97         | 6.05       | 43.24         | 0.39                  | 43.98                              | 3,165         | 9.04       | 22.93          |                                        |       |       |
|                                        |                        | SP-2         | 26.53        |            |          | 142.03         | 7.22       | 61.91         | 0.44                  | 36.09                              |               |            |                |                                        |       |       |
|                                        |                        | SP-3         | 29.61        |            |          | 96.95          | 4.66       | 32.88         | 0.34                  | 52.73                              |               |            |                |                                        |       |       |
|                                        | 82-114                 | 82-114-1     | 29.36        |            |          | 108.25         | 4.60       | 31.06         | 0.29                  | 49.64                              | 3,165         | 10.63      | 32.12          |                                        |       |       |
|                                        |                        | 82-114-2     | 23.85        |            |          | 95.04          | 5.27       | 34.27         | 0.36                  | 45.50                              |               |            |                |                                        |       |       |
|                                        |                        | 82-114-3     | 23.96        |            |          | 94.59          | 5.21       | 33.22         | 0.35                  | 45.69                              |               |            |                |                                        |       |       |
|                                        | Zhong Zhe No. 1 (ZZ01) | ZZ01-1       | 22.15        |            |          | 93.22          | 5.80       | 29.00         | 0.31                  | 48.35                              | 8,530         | 10.46      | 28.26          |                                        |       |       |
|                                        |                        | ZZ01-2       | 24.68        |            |          | 90.25          | 4.43       | 20.01         | 0.22                  | 56.25                              |               |            |                |                                        |       |       |
|                                        |                        | ZZ01-3       | 28.48        |            |          | 107.04         | 4.43       | 34.39         | 0.32                  | 43.42                              |               |            |                |                                        |       |       |
|                                        |                        | ZZ01-4       | 26.23        |            |          | 98.16          | 4.21       | 35.97         | 0.37                  | 39.47                              |               |            |                |                                        |       |       |
|                                        |                        | ZZ01-5       | 13.19        |            |          | 84.77          | 8.58       | 29.74         | 0.35                  | 33.79                              |               |            |                |                                        |       |       |
|                                        |                        | ZZ01-6       | 24.20        |            |          | 102.98         | 5.73       | 30.65         | 0.30                  | 44.19                              |               |            |                |                                        |       |       |
|                                        |                        | ZZ01-7       | 46.31        |            |          | 138.45         | 5.32       | 63.46         | 0.46                  | 53.00                              |               |            |                |                                        |       |       |
|                                        |                        | ZZ01-8       | 20.75        |            |          | 102.55         | 9.67       | 58.57         | 0.57                  | 43.55                              |               |            |                |                                        |       |       |
|                                        |                        |              | ZZ01-DpnII-1 |            |          | 30.10          | 87.06      | 3.86          | 313.63                | 3.60                               |               |            |                | 9.18                                   | 2,232 | 13.35 |
|                                        |                        | ZZ01-DpnII-2 | 28.67        |            |          | 80.13          | 3.83       | 288.42        | 3.60                  | 10.50                              |               |            |                |                                        |       |       |

**Note(\*):** The cost of Pore-C in *Arabidopsis* was referenced from a previous study (Li et al., 2022). All other costs were estimated using a standardized approach, with library preparation ranging from \$272.11 to (HindIII) to \$303.67 (DpnII), and sequencing costs totaling \$964.19. In this study, cost estimates were based on preparing and sequencing 2-3 cells per run.



**Supplementary Table 4** | Pseudocode of hypergraph construction

---

**Algorithm 1:** C-Phasing Hypergraph Construction

---

**Input:** Pore-C Table

**Output:** Incidence matrix  $H$

```

1 for each concatemer  $j$  do
2   if fragment locus in contig  $i$  then
3     if number of contigs  $2 \leq n_j < 50$  and alignment length  $l_i \geq 150$  then
4        $H(i, j) = 1$ 
5     else
6        $H(i, j) = 0$ 
7     end
8   else
9      $H(i, j) = 0$ 
10  end
11 end

```

---

**Supplementary Table 5** | Pseudocode of HyperPartition (basal)

---

**Algorithm 2:** Basal mode of HyperPartition

---

**Input:** Hypergraph incidence matrix  $H$ , Group number  $n$

**Output:** Cluster assignments  $C$

// Compute adjacency matrix

```

1  $A = H(D_e - I)^{-1}H^T$ ;
2  $A = \text{zero\_diag}(A)$ ;
3  $C = \text{LOUVAIN\_ALGORITHM}(A)$ ;
4  $c = \text{length}(C)$ ;
5 if  $c < n$  then
6    $C = \text{MERGE\_ALGORITHM}(C)$ ;
7   // Merge groups iteratively according to the edge weights
8 else
9    $C$ 
9 end

```

---

**Supplementary Table 6** | Performance of HyperPartition (basal) on simulation contigs of *Oryza sativa* Azucena by Pore-C.

| Contig N50 | Software  | % AR   | #G / #C | % Contiguity | % IE  | Precision | Recall | F1 score |
|------------|-----------|--------|---------|--------------|-------|-----------|--------|----------|
| 100 kb     | C-Phasing | 99.44  | 12/12   | 99.94        | 0.05  | 1.00      | 1.00   | 1.00     |
|            | ALLHiC    | 99.73  | 12/12   | 99.30        | 0.83  | 0.99      | 0.99   | 0.99     |
|            | YAHS      | 94.06  | 791/12  | 94.87        | 11.12 | 0.98      | 0.74   | 0.77     |
|            | HapHiC    | 94.32  | 12/12   | 93.31        | 7.31  | 0.95      | 0.88   | 0.90     |
| 500 kb     | C-Phasing | 99.49  | 12/12   | 100.00       | 0.00  | 1.00      | 1.00   | 1.00     |
|            | ALLHiC    | 99.70  | 12/12   | 99.45        | 0.68  | 0.99      | 0.99   | 0.99     |
|            | YAHS      | 99.70  | 40/12   | 97.69        | 20.81 | 0.89      | 0.77   | 0.71     |
|            | HapHiC    | 88.39  | 12/12   | 89.98        | 13.24 | 0.92      | 0.71   | 0.78     |
| 1 Mb       | C-Phasing | 99.49  | 12/12   | 99.95        | 0.04  | 1.00      | 1.00   | 1.00     |
|            | ALLHiC    | 99.63  | 12/12   | 96.92        | 4.20  | 0.98      | 0.96   | 0.97     |
|            | YAHS      | 99.81  | 20/12   | 99.96        | 13.86 | 0.84      | 0.83   | 0.79     |
|            | HapHiC    | 92.31  | 12/12   | 90.64        | 9.62  | 0.96      | 0.83   | 0.87     |
| 2 Mb       | C-Phasing | 99.49  | 12/12   | 100.00       | 0.00  | 1.00      | 1.00   | 1.00     |
|            | ALLHiC    | 100.00 | 12/12   | 93.24        | 7.47  | 0.96      | 0.93   | 0.94     |
|            | YAHS      | 99.92  | 11/12   | 100.00       | 19.96 | 0.63      | 0.67   | 0.64     |
|            | HapHiC    | 91.53  | 12/12   | 87.86        | 15.36 | 0.89      | 0.71   | 0.77     |
| 5 Mb       | C-Phasing | 100.00 | 12/12   | 100.00       | 0.00  | 1.00      | 1.00   | 1.00     |
|            | ALLHiC    | 100.00 | 12/12   | 100.00       | 0.00  | 1.00      | 1.00   | 1.00     |
|            | YAHS      | 99.95  | 10/12   | 100.00       | 19.95 | 0.58      | 0.58   | 0.58     |
|            | HapHiC    | 96.40  | 12/12   | 89.77        | 9.84  | 0.96      | 0.87   | 0.89     |

**Note:** AR, Anchor rate; G, Group; C, Chromosome; IE, Interchromosomal error. The scaffolds or contigs from the initial assembly were excluded for evaluation.

**Supplementary Table 7** | Performance of HyperPartition (basal) on public haploid assemblies and Pore-C data.

| Species              | Software  | % AR          | #G/#C  | % Contiguity | % IE        | Precision   | Recall      | F <sub>1</sub> |
|----------------------|-----------|---------------|--------|--------------|-------------|-------------|-------------|----------------|
| <i>M. polymorpha</i> | C-Phasing | <b>100.00</b> | 11/11  | <b>99.44</b> | 0.53        | 0.99        | <b>0.99</b> | <b>0.99</b>    |
|                      | ALLHiC    | 99.63         | 11/11  | 98.10        | 8.31        | 0.99        | 0.98        | 0.98           |
|                      | YAHS      | 97.24         | 217/11 | 98.95        | <b>0.36</b> | <b>1.00</b> | 0.96        | 0.98           |
|                      | HapHiC    | 81.92         | 11/11  | 95.94        | 14.62       | 0.90        | 0.67        | 0.75           |
| <i>G. hirsutum</i>   | C-Phasing | <b>99.99</b>  | 26/26  | <b>99.94</b> | <b>0.06</b> | <b>1.00</b> | <b>1.00</b> | <b>1.00</b>    |
|                      | ALLHiC    | 99.80         | 26/26  | 92.38        | 8.88        | 0.95        | 0.87        | 0.90           |
|                      | YAHS      | 95.70         | 46/26  | 99.16        | 17.47       | 0.95        | 0.76        | 0.75           |
|                      | HapHiC    | 99.44         | 26/26  | 98.62        | 1.76        | 0.98        | 0.98        | 0.98           |

**Note:** AR, Anchor rate; G, Group; C, Chromosome; IE, Interchromosomal error. The scaffolds or contigs from the initial assembly were excluded for evaluation. Furthermore, the %IE of YAHS in the *M. polymorpha* genome was the lowest, which was 0.36. Because the group numbers of YAHS are higher than those of other software, which will significantly decrease the % IE calculation.

**Supplementary Table 8** | Synthetic polyploid simulation based on different ecotypes of *Arabidopsis*.

| Assession | Ecotype ID | # SNPs  | # Indels | ploidy |   |   |   |    |
|-----------|------------|---------|----------|--------|---|---|---|----|
|           |            |         |          | 2      | 4 | 6 | 8 | 12 |
| An-1      | 6898       | 421,863 | 29,793   |        | A | A | A | A  |
| Cvi-0     | 6911       | 684,310 | 62,458   |        | B | B | B | B  |
| Kyoto     | 7207       | 439,345 | 30,844   |        |   | C | C | C  |
| Ler-1     | 6932       | 597,706 | 60,884   |        |   | D | D | D  |
| Altenb-2  | 9970       | 164,735 | 3,907    | E      | E | E | E | E  |
| TAL-07    | 6180       | 150,846 | 13,745   | F      | F | F | F | F  |
| Got-22    | 6920       | 541,987 | 47,266   |        |   |   | G | G  |
| Ms-0      | 6938       | 474,252 | 33,848   |        |   |   | H | H  |
| Bor-1     | 5837       | 418,323 | 30,809   |        |   |   |   | I  |
| Hs-0      | 7162       | 431,195 | 28,549   |        |   |   |   | J  |
| Cdm-0     | 9943       | 422,633 | 12,397   |        |   |   |   | K  |
| LL-0      | 6933       | 512,355 | 34,970   |        |   |   |   | L  |

**Supplementary Table 9** | Average normalized h-trans error between pseudo genomes

|          |        |        |        |        |        |        |        |        |        |        |        |  |
|----------|--------|--------|--------|--------|--------|--------|--------|--------|--------|--------|--------|--|
| An-1     | 0.3940 |        |        |        |        |        |        |        |        |        |        |  |
| Cvi-0    | 0.5282 | 0.3877 |        |        |        |        |        |        |        |        |        |  |
| Kyoto    | 0.5033 | 0.3751 | 0.5143 |        |        |        |        |        |        |        |        |  |
| Ler-1    | 0.6215 | 0.4474 | 0.6051 | 0.5688 |        |        |        |        |        |        |        |  |
| Altenb-2 | 0.6526 | 0.4664 | 0.6313 | 0.6159 | 0.8231 |        |        |        |        |        |        |  |
| TAL-07   | 0.5181 | 0.3822 | 0.4970 | 0.4919 | 0.5755 | 0.6041 |        |        |        |        |        |  |
| Got-22   | 0.4984 | 0.3697 | 0.5090 | 0.4849 | 0.5659 | 0.5889 | 0.4640 |        |        |        |        |  |
| Ms-0     | 0.5331 | 0.3894 | 0.5616 | 0.5159 | 0.6174 | 0.6420 | 0.4997 | 0.5093 |        |        |        |  |
| Bor-1    | 0.5635 | 0.3941 | 0.5317 | 0.5060 | 0.6222 | 0.6503 | 0.5292 | 0.4990 | 0.5348 |        |        |  |
| Hs-0     | 0.5137 | 0.3737 | 0.4927 | 0.4641 | 0.5923 | 0.6067 | 0.4760 | 0.4589 | 0.4980 | 0.5059 |        |  |
| Cdm-0    | 0.5038 | 0.3774 | 0.4934 | 0.4710 | 0.5683 | 0.5931 | 0.4852 | 0.4621 | 0.4958 | 0.4987 | 0.4885 |  |
| LL-0     |        |        |        |        |        |        |        |        |        |        |        |  |

**Supplementary Table 10** | Assembly statistics for simulated polyploid genomes at contig-level

| Ploidy | # of contigs | Genome size (bp) | Contig N50 (bp) | Minimum length (bp) | Average length (bp) | Maximum length (bp) | Q1 (bp)    | Q2 (bp)    | Q3 (bp)      |
|--------|--------------|------------------|-----------------|---------------------|---------------------|---------------------|------------|------------|--------------|
| 2      | 4,471        | 238,298,347      | 48,616          | 6,794               | 53,298.70           | 4,933,106           | 21,633.50  | 32,176     | 43,746       |
| 2      | 2,466        | 238,298,347      | 96,363          | 10,002              | 96,633.60           | 4,957,432           | 36,375     | 62,459.50  | 88,199       |
| 2      | 563          | 238,298,347      | 483,495         | 10,084              | 423,265.30          | 4,915,373           | 144,612.50 | 297,993    | 455,831      |
| 2      | 293          | 238,298,347      | 993,289         | 11,168              | 813,304.90          | 4,881,612           | 289,070    | 585,017    | 929,864      |
| 2      | 162          | 238,298,347      | 1,945,088       | 13,293              | 1,470,977.50        | 4,909,547           | 594,949    | 1,302,699  | 1,943,540    |
| 4      | 9,084        | 476,605,983      | 48,360          | 6,121               | 52,466.50           | 4,959,454           | 21,028.50  | 32,840.50  | 44,410       |
| 4      | 4,865        | 476,605,983      | 97,099          | 898                 | 97,966.30           | 4,989,449           | 36,784     | 62,247     | 88,211       |
| 4      | 1,099        | 476,605,983      | 484,653         | 12,158              | 433,672.40          | 4,917,970           | 156,546.50 | 294,649    | 444,035.50   |
| 4      | 593          | 476,605,983      | 976,713         | 14,846              | 803,720             | 4,956,264           | 324,286    | 633,401    | 934,641      |
| 4      | 322          | 476,605,983      | 1,948,762       | 15,599              | 1,480,142.80        | 4,936,277           | 646,564    | 1,206,224  | 1,936,073    |
| 6      | 13,518       | 714,925,126      | 48,381          | 393                 | 52,886.90           | 4,985,818           | 21,745     | 33,197     | 44,750       |
| 6      | 7,423        | 714,925,126      | 96,813          | 556                 | 96,312.20           | 4,986,816           | 36,462.50  | 62,285     | 88,297       |
| 6      | 1,658        | 714,925,126      | 482,513         | 10,209              | 431,197.30          | 4,977,688           | 161,780    | 304,543.50 | 449,900      |
| 6      | 865          | 714,925,126      | 973,746         | 10,222              | 826,503             | 4,957,760           | 344,694    | 670,828    | 932,460      |
| 6      | 461          | 714,925,126      | 1,932,880       | 22,186              | 1,550,813.70        | 4,997,430           | 709,540    | 1,469,641  | 1,943,279    |
| 8      | 17,949       | 953,235,842      | 48,501          | 58                  | 53,108              | 4,858,648           | 21,175     | 32,723     | 44,078       |
| 8      | 9,913        | 953,235,842      | 96,592          | 5,129               | 96,160.20           | 4,886,758           | 36,296     | 62,248     | 88,289       |
| 8      | 2,175        | 953,235,842      | 487,126         | 1,678               | 438,269.40          | 4,993,863           | 158,269    | 306,642    | 450,715.50   |
| 8      | 1,188        | 953,235,842      | 978,786         | 11,178              | 802,387.10          | 4,935,403           | 293,158    | 594,134    | 919,943.50   |
| 8      | 623          | 953,235,842      | 1,928,734       | 15,445              | 1,530,073.60        | 4,983,117           | 689,125.50 | 1,355,870  | 1,926,144.50 |
| 12     | 27,576       | 1,429,847,861    | 48,297          | 231                 | 51,851.20           | 4,998,911           | 21,506.50  | 33,093     | 44,807.50    |
| 12     | 14,867       | 1,429,847,861    | 96,501          | 1,364               | 96,176              | 4,995,445           | 36,410.50  | 62,171     | 88,338       |
| 12     | 3,293        | 1,429,847,861    | 482,280         | 10,091              | 434,208.30          | 4,993,829           | 166,057    | 309,654    | 452,939      |
| 12     | 1,706        | 1,429,847,861    | 975,919         | 3,377               | 838,128.90          | 4,995,301           | 335,196    | 641,677.50 | 928,530      |
| 12     | 956          | 1,429,847,861    | 1,944,548       | 10,266              | 1,495,656.80        | 4,977,643           | 668,236    | 1,330,420  | 1,947,805.50 |

**Supplementary Table 11** | Partitioning performance on simulated dodecaploid genomes

| Ploidy level | Contig N50 | Software           | Whole genome     |                         |                      | Haplotype E and F |                         |                      |
|--------------|------------|--------------------|------------------|-------------------------|----------------------|-------------------|-------------------------|----------------------|
|              |            |                    | Correct rate (%) | Mis-assignment rate (%) | Un-anchored rate (%) | Correct rate (%)  | Mis-assignment rate (%) | Un-anchored rate (%) |
| 12           | 500 kb     | C-Phasing (Pore-C) | 99.82            | 0.09                    | 0.09                 | 99.50             | 0.26                    | 0.24                 |
| 12           | 500 kb     | C-Phasing (Hi-C)   | 98.75            | 0.18                    | 1.06                 | 94.73             | 1.10                    | 4.17                 |
| 12           | 500 kb     | HapHiC             | 73.09            | 8.93                    | 17.98                | 18.56             | 36.70                   | 44.75                |
| 12           | 500 kb     | ALLHiC             | 81.01            | 9.65                    | 9.33                 | 44.74             | 15.77                   | 39.50                |
| 12           | 2 Mb       | C-Phasing (Pore-C) | 99.96            | 0.00                    | 0.03                 | 99.99             | 0.01                    | 0.00                 |
| 12           | 2 Mb       | C-Phasing (Hi-C)   | 99.87            | 0.00                    | 0.13                 | 99.42             | 0.00                    | 0.58                 |
| 12           | 2 Mb       | HapHiC             | 90.46            | 4.94                    | 4.60                 | 48.31             | 29.64                   | 22.05                |
| 12           | 2 Mb       | ALLHiC             | 91.22            | 2.68                    | 6.09                 | 81.75             | 0.00                    | 18.25                |

**Supplementary Table 12** | Statistics of 700-bp ONT read alignments in sweet potato

| Type of alignments                                     | Number     |
|--------------------------------------------------------|------------|
| Total mapped                                           | 50,238,766 |
| Mapped to a homologous chromosome                      | 4,551,285  |
| Having a correct secondary alignment                   | 4,272,417  |
| Same MAPQ as the secondary alignment                   | 3,639,682  |
| Same alignment score as the secondary alignment        | 3,456,352  |
| Same identity as the secondary alignment               | 3,547,768  |
| Same edit distance as the secondary alignment          | 3,455,516  |
| Same inconsistent 5mC sites as the secondary alignment | 2,260,454  |
| Primary alignment MAPQ = 0                             | 3,810,406  |
| Secondary alignment MAPQ = 0                           | 4,272,069  |

**Supplementary Table 13** | Summary statistics of sequencing datasets used for benchmarking.

| Sample                | Data type  | Size (Gb) | Coverage | Platform                | Source           |
|-----------------------|------------|-----------|----------|-------------------------|------------------|
| alfalfa Zhongmu-4     | HiFi       | 136.06    | 43.89    | PacBio Sequel           | CNCB:PRJCA004062 |
|                       | Ultra-long | 74.66     | 24.08    | Oxford Nanopore (R9.4)  | CNCB:PRJCA031790 |
|                       | Hi-C       | 284.82    | 91.88    | Illumina NovaSeq        | CNCB:PRJCA004062 |
|                       | Pore-C     | 139.34    | 44.95    | Oxford Nanopore (R10.4) | CNCB:PRJCA041059 |
| sweet potato 1393     | HiFi       | 100.22    | 36.05    | PacBio Revio            | This study       |
|                       | Ultra-long | 115.03    | 41.38    | Oxford Nanopore (R10.4) | This study       |
|                       | Hi-C       | 451.73    | 162.49   | Illumina HiSeq 1500     | CNGBdb:CN0004414 |
|                       | Pore-C     | 349.95    | 125.88   | Oxford Nanopore (R10.4) | This study       |
| wild sugarcane 82-114 | HiFi       | 230.84    | 33.07    | PacBio Revio            | This study       |
|                       | Ultra-long | 97.9      | 14.03    | Oxford Nanopore (R10.4) | This study       |
|                       | Hi-C       | 302.7     | 43.37    | MGI DNBSEQ T7           | This study       |
|                       | Pore-C     | 297.88    | 42.68    | Oxford Nanopore (R10.4) | This study       |

**Supplementary Table 14** | Benchmarking of C-Phasing on real datasets

| Species                                 | Assemble strategy | Data   | Software  | Assembly size (Gb) / Estimate size (Gb) | # of contigs | Contig NG50 (Mb) | Anchored size (Mb) | Anchor rate (%) | Adjusted anchor rate (%) | # of Misjoined | % of Misjoined | Wall time (s) | Peak memory (Gb) |
|-----------------------------------------|-------------------|--------|-----------|-----------------------------------------|--------------|------------------|--------------------|-----------------|--------------------------|----------------|----------------|---------------|------------------|
| Alfalfa<br>Zhongmu-4<br>(2n=4x=32)      | HiFi-only         | Pore-C | C-Phasing | 3.54 / 3.10                             | 24,042       | 1.54             | 2,847.73           | 80.55           | 91.86                    | 107            | 0.47           | 471.04        | 10.08            |
|                                         |                   | Hi-C   | C-Phasing |                                         |              |                  | 2,754.58           | 77.92           | 88.86                    | 49             | 0.53           | 1033.55       | 29.35            |
|                                         |                   | HapHiC | 2,745.03  |                                         |              |                  | 77.65              | 88.55           | 127                      | 0.72           | 1030.73        | 10.60         |                  |
|                                         | HiFi-UL           | Pore-C | C-Phasing | 3.18 / 3.10                             | 6,312        | 4.37             | 2,989.89           | 94.05           | 96.45                    | 0              | 0.00           | 465.68        | 10.69            |
|                                         |                   | Hi-C   | C-Phasing |                                         |              |                  | 2,928.30           | 92.11           | 94.46                    | 39             | 0.44           | 554.43        | 25.45            |
|                                         |                   | HapHiC | 2,903.29  |                                         |              |                  | 91.33              | 93.65           | 88                       | 1.00           | 925.46         | 9.25          |                  |
| Sweet potato<br>1393<br>(2n=6x=90)      | HiFi-only         | Pore-C | C-Phasing | 3.26 / 2.78                             | 27,220       | 1.62             | 2,505.69           | 76.86           | 90.13                    | 524            | 1.38           | 915.73        | 20.46            |
|                                         |                   | Hi-C   | C-Phasing |                                         |              |                  | 2,366.98           | 72.60           | 85.14                    | 179            | 0.98           | 1116.20       | 35.63            |
|                                         |                   | HapHiC | 2,318.44  |                                         |              |                  | 71.11              | 83.40           | 404                      | 2.25           | 1192.92        | 9.44          |                  |
|                                         | HiFi-UL           | Pore-C | C-Phasing | 2.85 / 2.78                             | 7,529        | 5.52             | 2,620.83           | 92.04           | 94.27                    | 306            | 1.15           | 762.93        | 19.81            |
|                                         |                   | Hi-C   | C-Phasing |                                         |              |                  | 2,503.80           | 87.93           | 90.06                    | 150            | 0.75           | 760.74        | 31.68            |
|                                         |                   | HapHiC | 2,438.27  |                                         |              |                  | 85.63              | 87.71           | 156                      | 1.39           | 1091.74        | 6.54          |                  |
| Wild sugarcane<br>82-114<br>(2n=10x=80) | HiFi-only         | Pore-C | C-Phasing | 7.45 / 6.98                             | 20,332       | 5.52             | 6,811.67           | 91.39           | 97.59                    | 153            | 0.44           | 765.52        | 17.64            |
|                                         |                   | Hi-C   | C-Phasing |                                         |              |                  | 6,681.72           | 89.64           | 95.73                    | 65             | 0.52           | 639.22        | 13.90            |
|                                         |                   | HapHiC | 6,631.42  |                                         |              |                  | 88.97              | 95.01           | 61                       | 0.94           | 567.64         | 15.64         |                  |
|                                         | HiFi-UL           | Pore-C | C-Phasing | 7.09 / 6.98                             | 3,796        | 25.75            | 6,927.14           | 97.72           | 99.24                    | 52             | 1.33           | 729.41        | 17.99            |
|                                         |                   | Hi-C   | C-Phasing |                                         |              |                  | 6,834.05           | 96.41           | 97.91                    | 31             | 0.47           | 588.17        | 13.25            |
|                                         |                   | HapHiC | 6,817.21  |                                         |              |                  | 96.17              | 97.67           | 50                       | 2.15           | 514.66         | 14.68         |                  |

**Note:** The contig NG50 was computed using the estimated genome size as the reference. The adjusted anchor rate is calculated by dividing the total length of anchored contigs by the estimated genome size. For instance, alfalfa (HiFi-only) anchored 2,847.73 Mb with Pore-C data out of an estimated 3,100 Mb genome, yielding an adjusted anchor rate of 91.86%.

**Supplementary Table 15** | Statistics of alignments and contacts before and after Methalign.

| Items                                         | HiFi-only |                |               | HiFi-UL  |                |               |
|-----------------------------------------------|-----------|----------------|---------------|----------|----------------|---------------|
|                                               | Align     | HiFi-Methalign | ONT-Methalign | Align    | HiFi-Methalign | ONT-Methalign |
| # of valid alignments (M)                     | 41.13     | 47.21          | 46.57         | 42.18    | 48.16          | 47.72         |
| % of valid alignments                         | 65.34     | 75.01          | 73.98         | 67.00    | 76.50          | 75.81         |
| # of valid reads (M)                          | 10.30     | 12.11          | 11.91         | 10.58    | 12.40          | 12.27         |
| % of valid reads                              | 40.52     | 47.67          | 46.88         | 41.64    | 48.79          | 48.27         |
| # of valid contacts (M)                       | 37.77     | 46.14          | 45.53         | 39.30    | 48.08          | 47.65         |
| Total length of weakly connected contigs (Mb) | 423.40    | 63.73          | 61.82         | 61.65    | 12.08          | 12.26         |
| Anchored length (Mb)                          | 2,393.93  | 2,857.71       | 2,842.17      | 2,534.75 | 2,725.55       | 2,724.41      |
| Adjusted anchor rate (%)                      | 86.11     | 102.80         | 102.24        | 91.18    | 98.04          | 98.00         |

### 3 Supplementary Figures

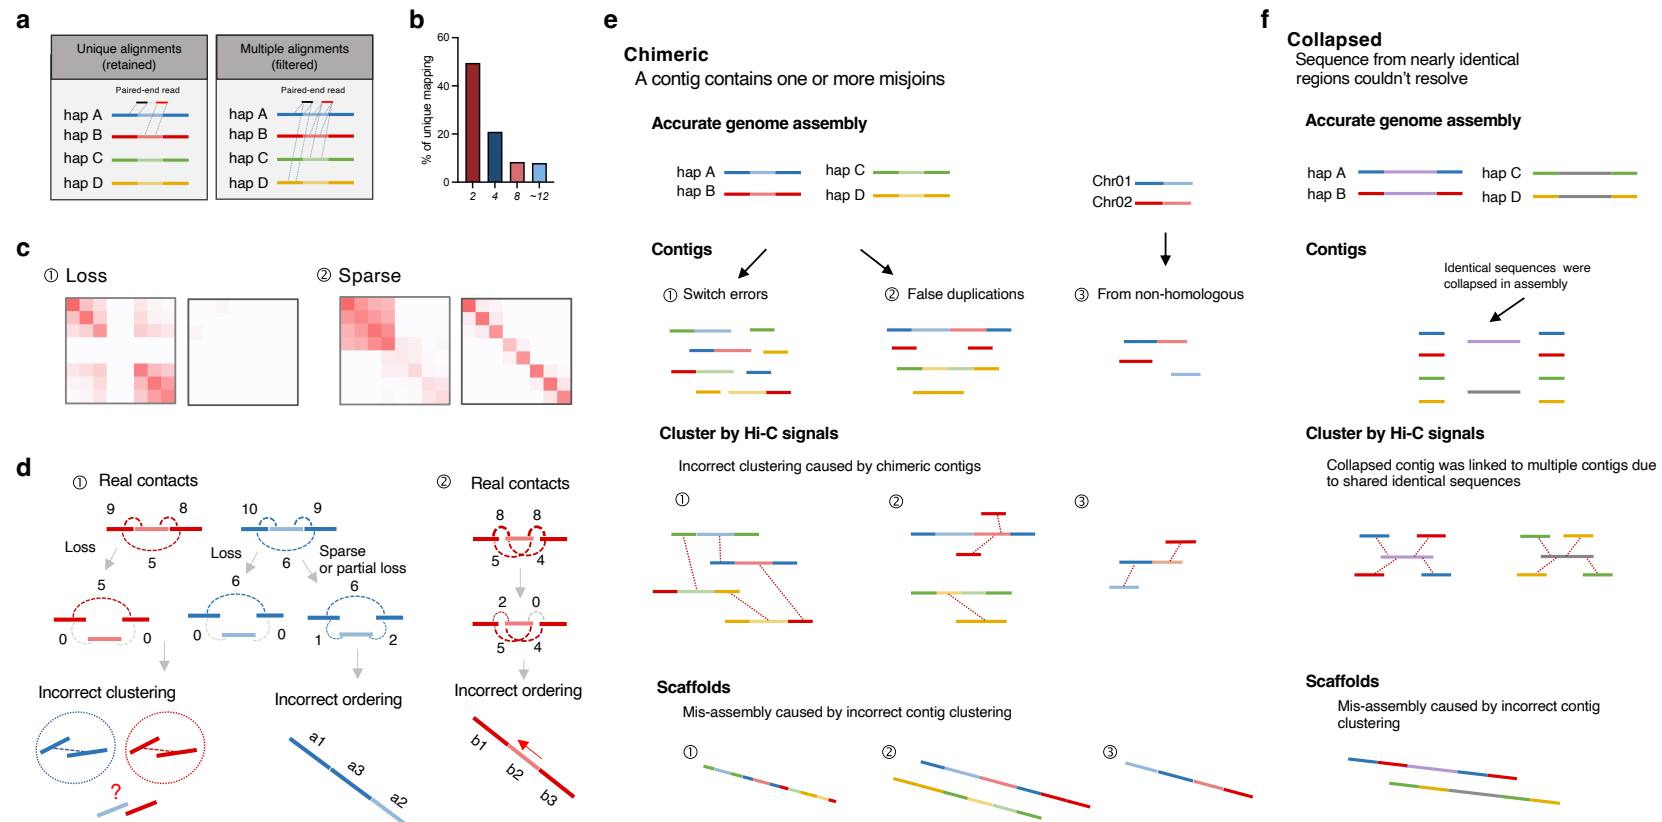

**Supplementary Fig. 1 | Schematic illustrating the challenges of phasing and scaffolding using Hi-C data in complex polyploids.** **a**, Schematic illustrating unique and multiple alignments. **b**, Schematic showing the percentage of unique alignments across different ploidy levels. **c**, Schematic illustrating two types of complex contig regions: (1) "loss", where a genomic region or entire contig loses all contacts; and (2) "sparse", where the loss of several contacts results in sparse signals. **d**, Schematic showing how loss or sparse contacts affect contig clustering and scaffolding. **e, f**, Schematics illustrating how chimeric or collapsed contigs affect contig clustering and scaffolding.

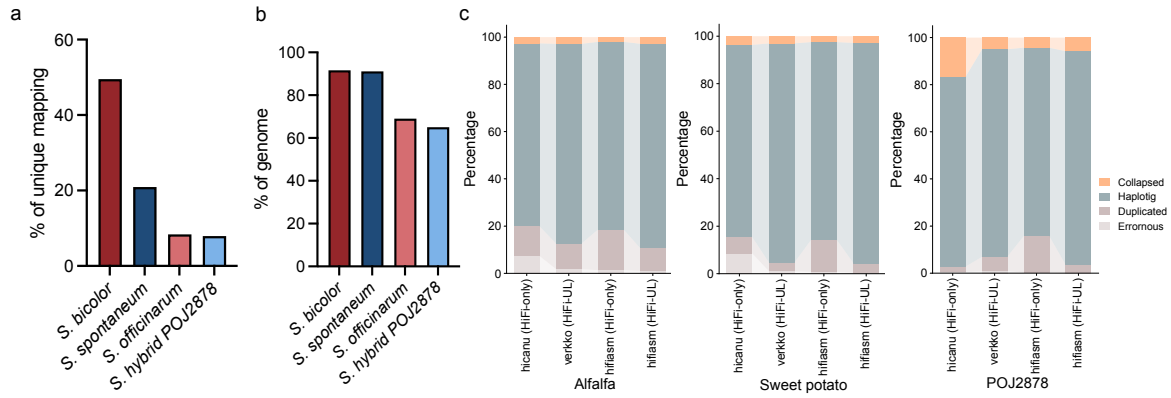

**Supplementary Fig. 2 | Problem of polyploid assembly.** **a**, Statistics of the unique mapped read pairs of different genomes. **b**, Statistics of the contigs covered by at least one valid restriction site indicate that the up- and downstream 500 bp of each site covered enough contacts (at least 25). **c**, Statistics of genome components (including erroneous, duplicated, haplotig, and collapsed regions) for each assembly, based on comparisons among different assembly results.

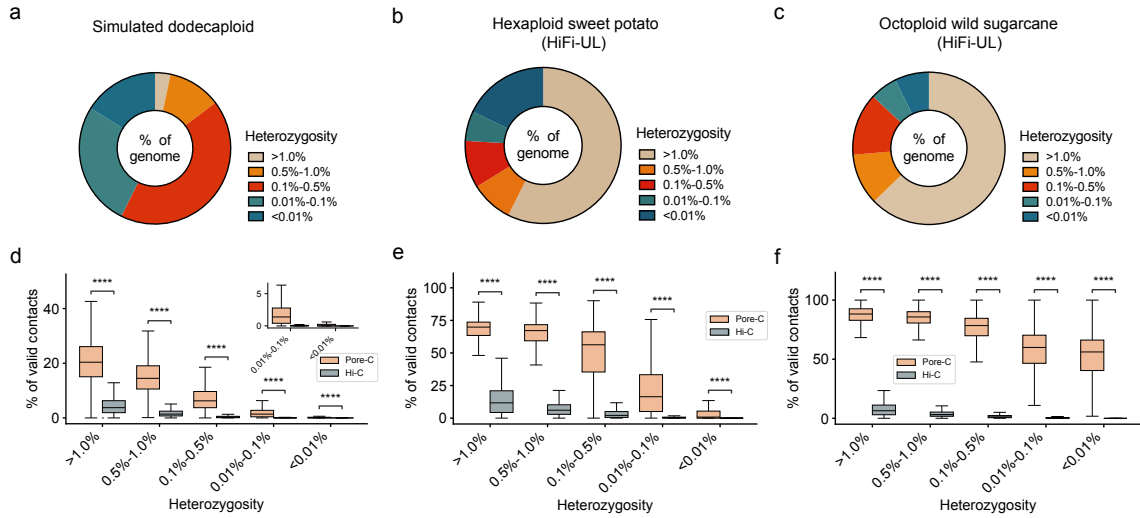

**Supplementary Fig. 3 | Comparison of valid contacts between Pore-C and Hi-C at different levels of heterozygosity.** These cases are shown: simulated dodecaploid (**a**, **d**), hexaploid sweet potato (**b**, **e**), and octaploid wild sugarcane (**c**, **f**). We categorize sequences with heterozygosity between 0.01% and 1.0% as highly similar, and those with heterozygosity below 0.01% as nearly or completely identical. Heterozygosity was estimated by self-mapping using 5-kb sliding windows. For sequences with multiple mappings, the minimum heterozygosity value was retained. **d-f**, Comparison of valid contacts between Pore-C and Hi-C under varying levels of heterozygosity. Valid contacts for Pore-C were derived from virtual pairwise contacts with  $\text{MAPQ} \geq 2$ , whereas Hi-C contacts were filtered using  $\text{MAPQ} \geq 1$ . The proportion of valid contacts was defined as the ratio of valid to total contacts. P-values were calculated using two-sided Wilcoxon rank-sum tests. \*\*\*\* indicates  $P < 1.00\text{e-}04$ .



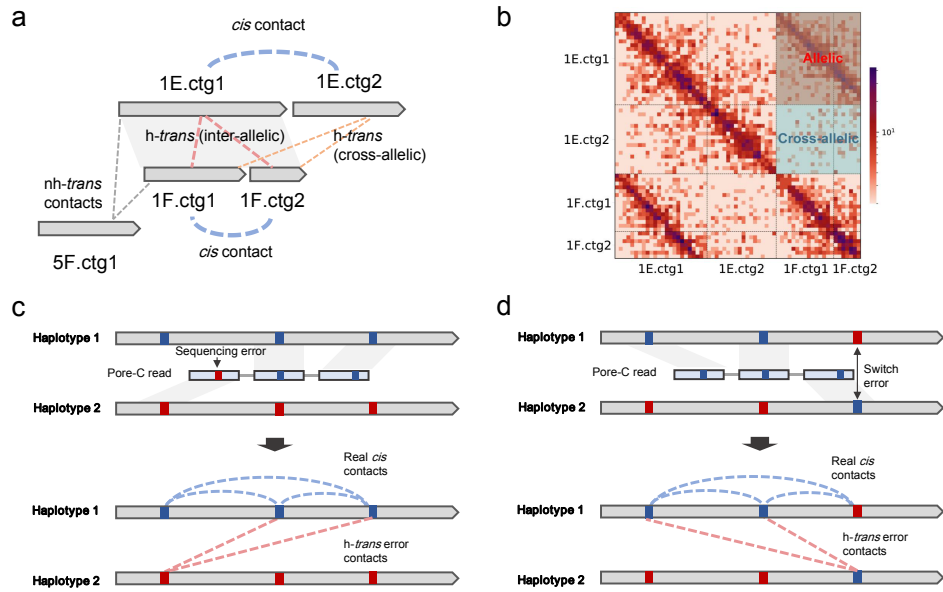

**Supplementary Fig. 4 | Schematic illustration of *h-trans* contacts and its associated error sources.** **a**, Diagram showing *cis* and *h-trans* contacts. *Cis* contacts refer to interactions between two contigs from the same chromosome (e.g., 1E.ctg1 and 1E.ctg2, 1F.ctg1 and 1F.ctg2), while *trans* contacts occur between contigs from different chromosomes. In diploid or polyploid genomes, trans contacts can be further classified as *h-trans* (between homologous chromosomes; red and orange dashed lines) and *nh-trans* (between non-homologous chromosomes; grey dashed lines). An inter-allelic contig pair representing different alleles at the same genomic position (e.g., 1E.ctg1 and 1F.ctg1 or 1F.ctg2), whereas a cross-allelic contig pair refers to two contigs from homologous chromosomes located at different genomic positions (e.g., 1E.ctg2 and 1F.ctg1 or 1F.ctg2). **b**, Heatmap of Pore-C contacts at 100 kb resolution, highlighting *cis* signals from inter-allelic and cross-allelic contig pairs. **c,d**, Schematic representations of two major sources of *h-trans* errors: sequencing errors in Pore-C reads (**c**) and switch errors between homologous regions (**d**).

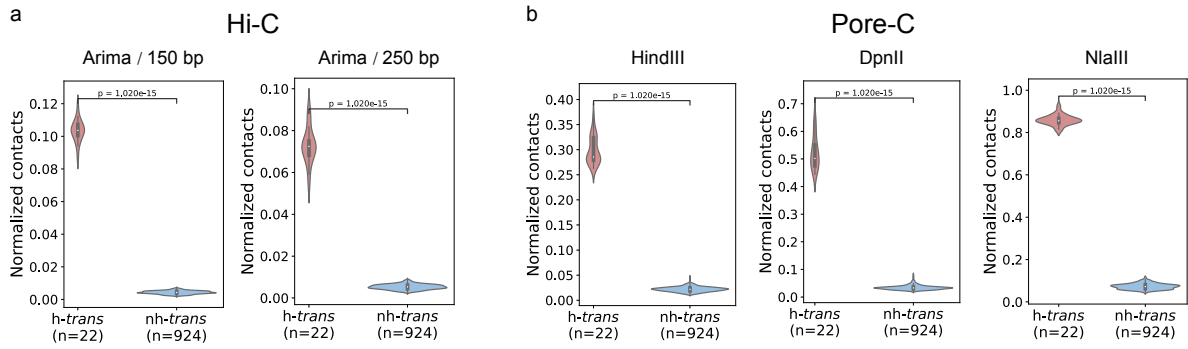

**Supplementary Fig. 5 | Comparison of *h-trans* and *nh-trans* contacts.** Comparison of *h-trans* and *nh-trans* contacts was performed using the haplotype-resolved HG002 human genome with corresponding Hi-C (**a**) and Pore-C (**b**) data. Pore-C and Hi-C contacts were filtered with MAPQ  $\geq 1$ . *h-trans* contacts refer to interactions between homologous chromosomes (e.g., chr1\_maternal and chr1\_paternal), while *nh-trans* contacts represent interactions between non-homologous chromosomes (e.g., chr1\_maternal and chr2\_maternal or chr2\_paternal). P-values were calculated using two-sided Wilcoxon rank-sum tests.

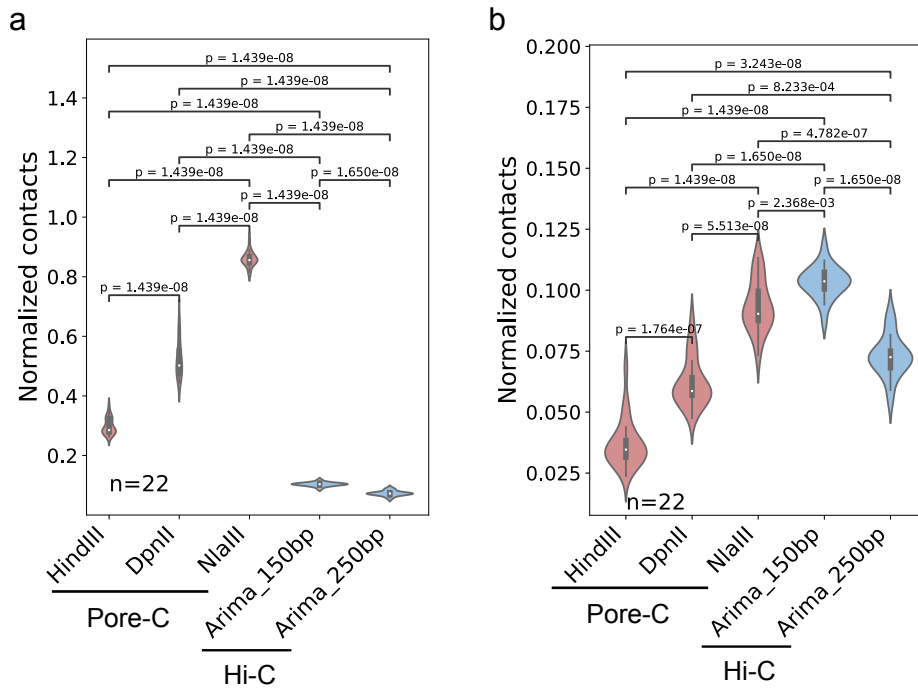

**Supplementary Fig. 6 | Comparison of *h-trans* contacts across different datasets.** Comparison of *h-trans* contacts was performed between Hi-C and Pore-C data from the HG002 genome, including libraries constructed using different restriction enzymes. **a**, Contacts filtered with a minimum mapping quality (MAPQ) of 1. **b**, Contacts filtered with a minimum mapping quality (MAPQ) of 2. P-values were calculated using two-sided Wilcoxon rank-sum tests.

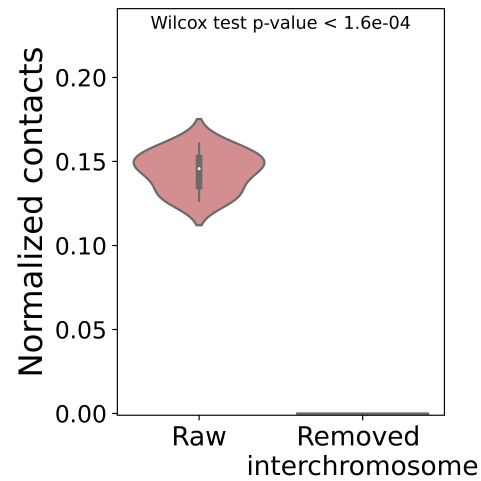

**Supplementary Fig. 7 | Comparison of interchromosomal contacts between raw and filtered Pore-C contact maps.** To simulate Pore-C data from different ecotypes, interchromosomal interactions were initially removed to assess their impact on downstream polyploid simulations. Violin plots show the distribution of interchromosomal contacts in the raw Pore-C maps and after filtering.

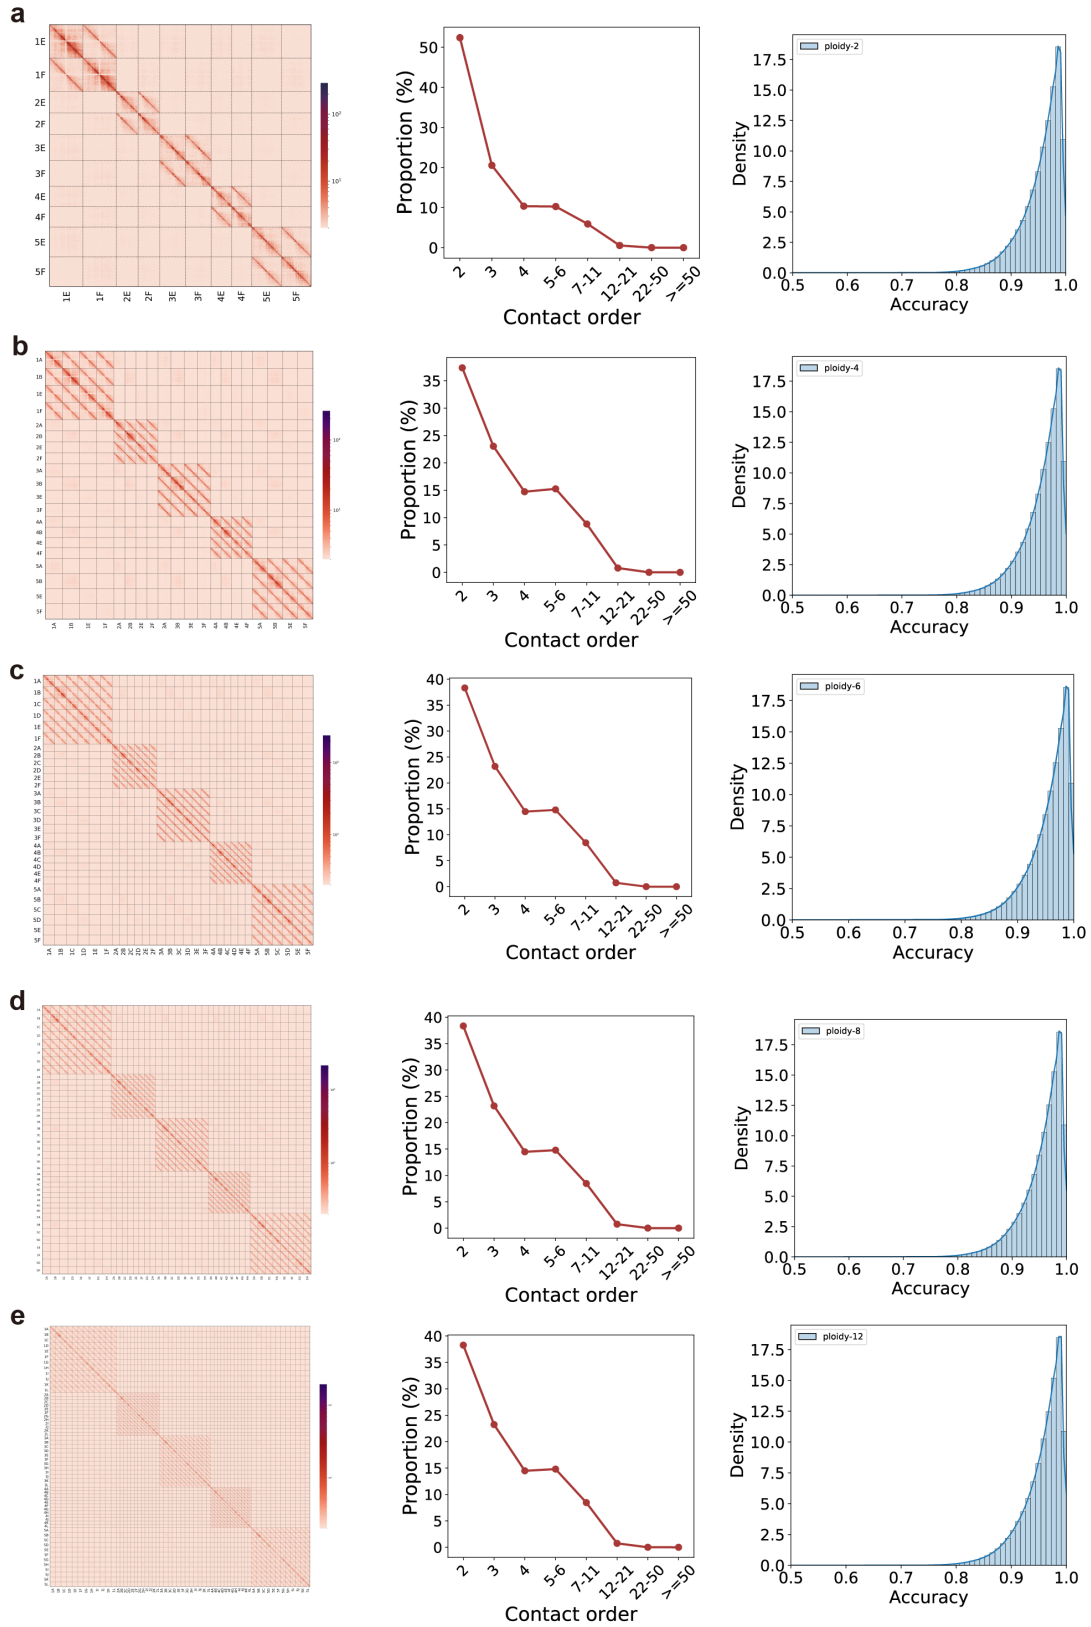

**Supplementary Fig. 8 | Summary statistics of the synthetic Pore-C data.** Approximately 5× coverage of synthetic Pore-C data was generated for evaluating polyploid genomes. The left panel shows contact heatmaps at 100-kb resolution; the middle panel displays the distribution of concatenemer orders; and the right panel shows the accuracy distribution of simulated Pore-C reads. Panels **a** to **e** correspond to ploidy levels of 2, 4, 6, 8, and 12, respectively.

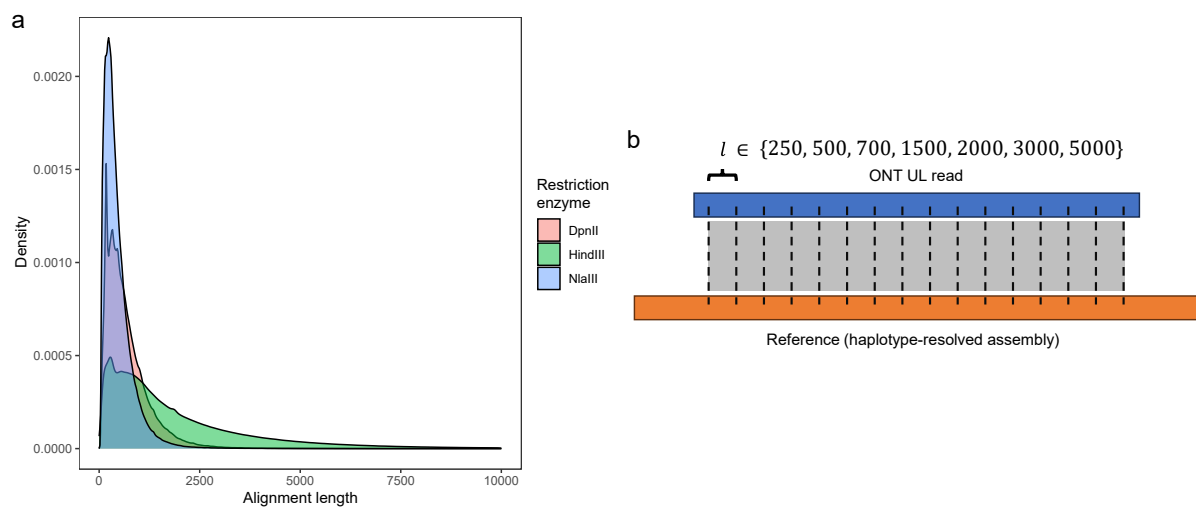

**Supplementary Fig. 9 | Simulation of short ONT reads.** **a**, Distribution of alignment lengths of Pore-C reads generated using different restriction enzymes. These Pore-C reads are obtained from the publicly available Human HG002 datasets. **b**, Artificially splitting of ONT ultra-long reads exceeding 100 kb in length into shorter reads ranging from 250 bp to 5 kb.

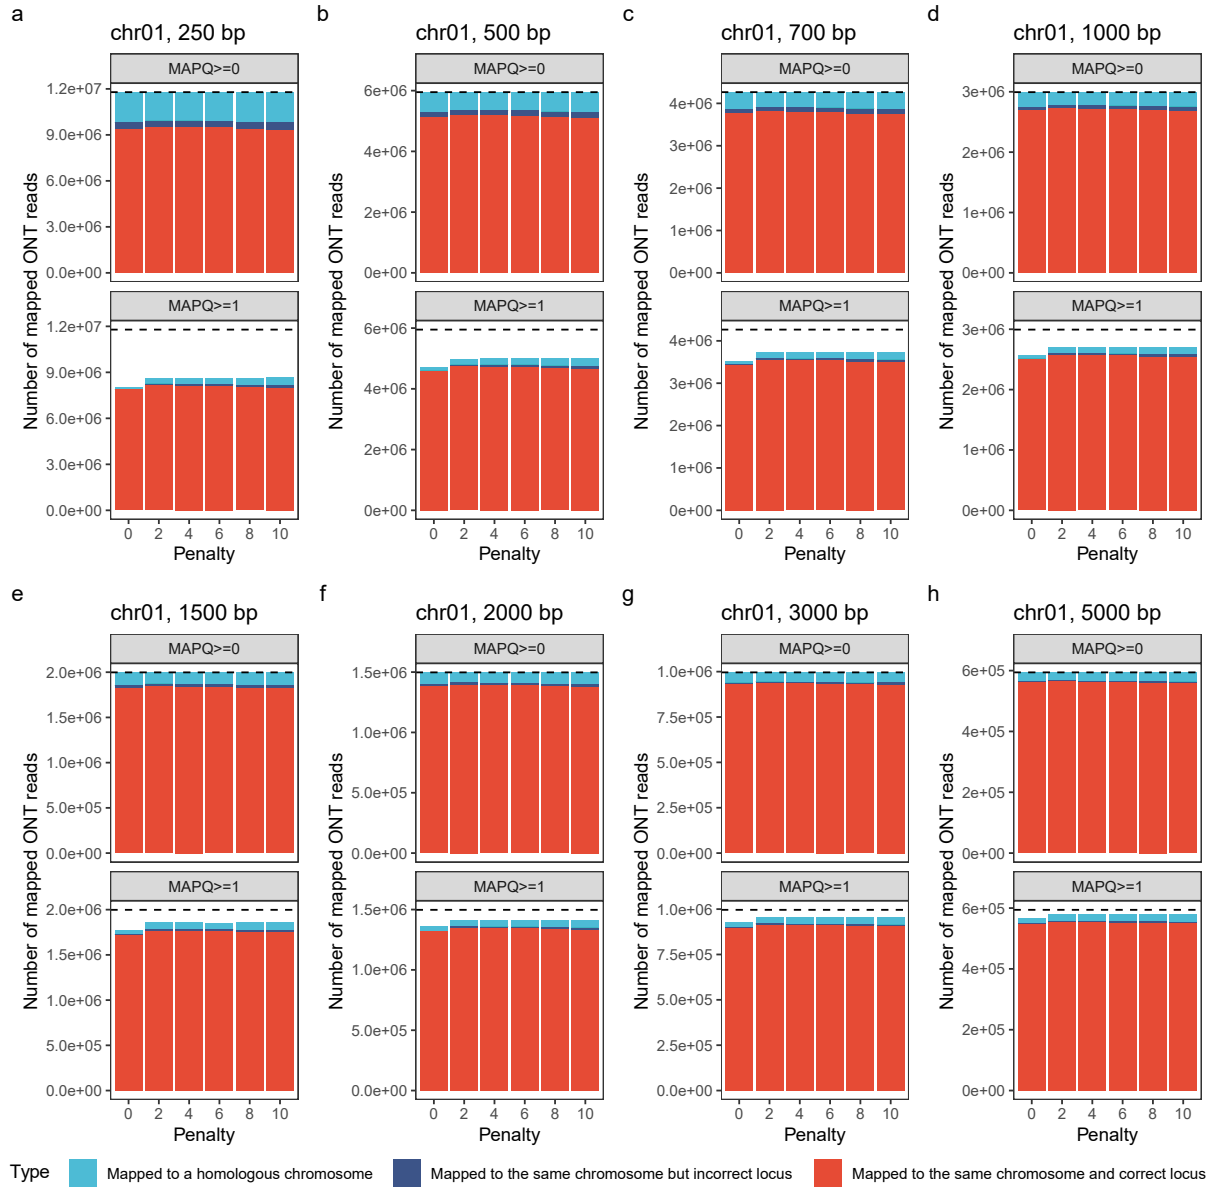

**Supplementary Fig. 10 | Mapping accuracy statistics of simulated short ONT reads.** The analysis was conducted on homologous chromosome group 1 of sweet potato using simulated ONT reads of varying lengths: 250 bp (**a**), 500 bp (**b**), 700 bp (**c**), 1,000 bp (**d**), 1,500 bp (**e**), 2,000 bp (**f**), 3,000 bp (**g**), and 5,000 bp (**h**).

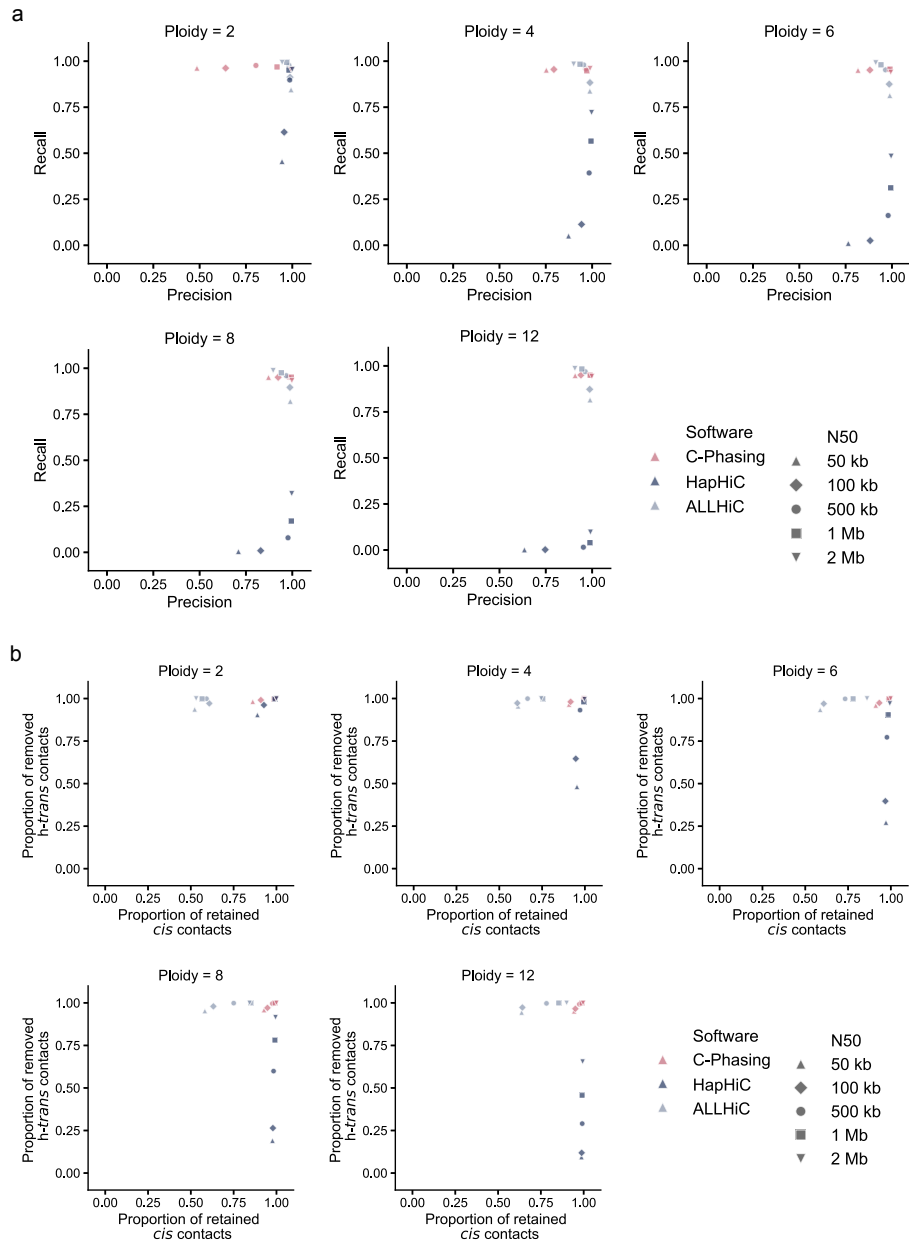

**Supplementary Fig. 11 | Evaluation of Kprune's performance on synthetic polyploid datasets across varying contiguity and ploidy levels. a,** Performance of inter-allelic contig pair identification. A dot located in the upper right corner indicates the best performance, reflecting both high precision and recall. Notably, a higher recall rate facilitates comprehensive detection of cross-allelic contig pairs. **b,** Performance in removing *h-trans* contacts while retaining *cis* contacts. A dot in the upper right corner represents an optimal trade-off, ensuring effective removal of erroneous *h-trans* signals while preserving informative *cis* interactions, which is critical for accurate separation of homologous chromosomes. In both panels, each dot represents an individual sample, with colors denoting different software tools and shapes indicating contig N50 values. Red dots: C-Phasing-Kprune; dark blue: HapHiC-Remove; light blue: ALLHiC-Prune. Shapes: upward triangle (50 kb), diamond (100 kb), circle (500 kb), rectangle (1 Mb), and downward triangle (2 Mb).

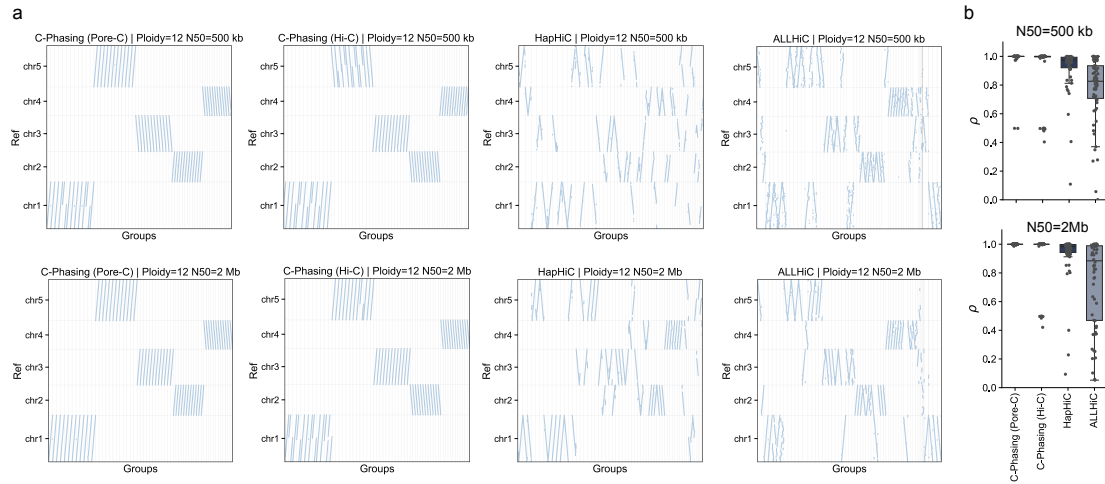

**Supplementary Fig. 12 | Benchmarking of phasing and scaffolding using simulation data.** The results were obtained from phasing and scaffolding analyses performed on simulated dodecaploid contig-level genomes, using either Pore-C or Hi-C data. The top and bottom panels correspond to assemblies with contig N50 values of 500 kb and 2 Mb, respectively. **a**, Dot plots under different experimental conditions. **b**, Box plots showing the absolute Spearman correlation coefficients between the ground truth and the results produced by different software tools. Each box represents the distribution across all chromosomes, with the central line indicating the median, box edges denoting the interquartile range (IQR), and whiskers extending to  $1.5 \times$  IQR. Outliers are shown as individual points. The number of chromosomes ( $n = 60$ ) was used for each tool under both N50 settings.



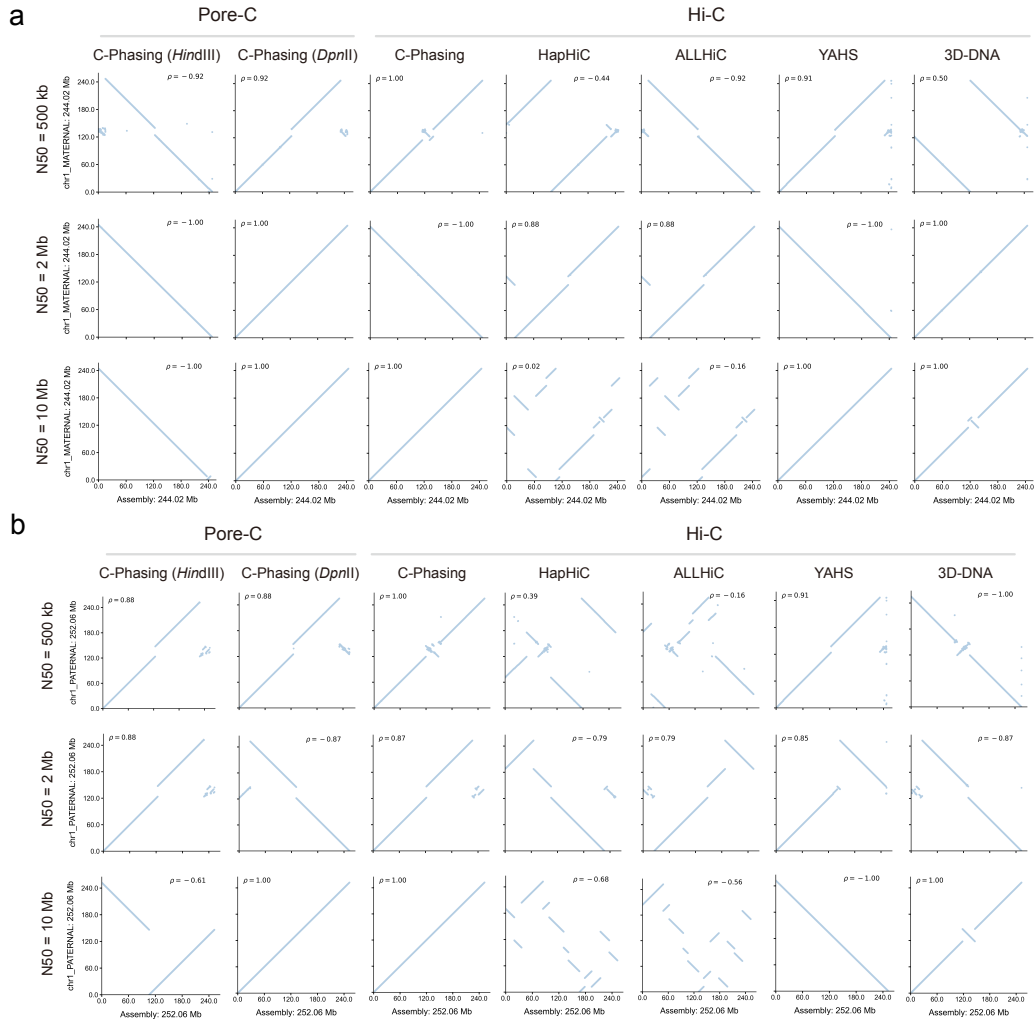

**Supplementary Fig. 13 | Evaluation of scaffolding using simulation data.** The haplotype-resolved genome of HG002 was downloaded and its chromosomes were fragmented into contigs with varying N50 values (500 kb, 2 Mb, and 10 Mb). Dot plots and absolute Spearman correlation coefficients were generated to compare the scaffolding accuracy of different software tools. Our method, C-Phasing, was evaluated using two Pore-C datasets of HG002, digested with *HindIII* and *DpnII*, respectively. In addition, the performance of C-Phasing using Hi-C data was compared with several state-of-the-art tools, including HapHiC, ALLHiC, YAHS, and 3D-DNA. Results for chromosome 1 of the maternal (**a**) and paternal (**b**) haplotypes are shown.

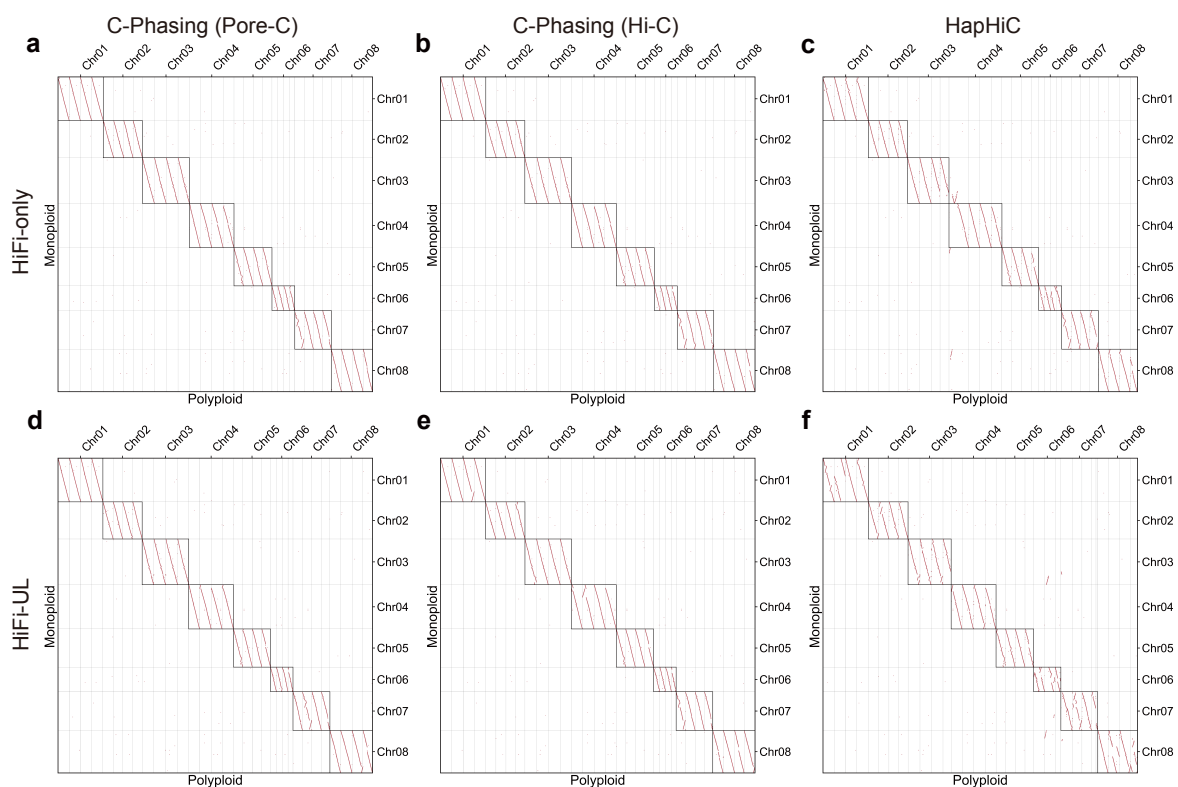

**Supplementary Fig. 14 | Syntenic dot plots of alfalfa assemblies generated by different scaffolding strategies, used to benchmark chromosome-scale assembly accuracy on real data.**

**Supplementary Fig. 15 | Heatmaps of alfalfa Pore-C or Hi-C contact maps at 500 kb resolution for benchmarking chromosome-scale assembly performance using real data.**

*(included in separate PDF file)*

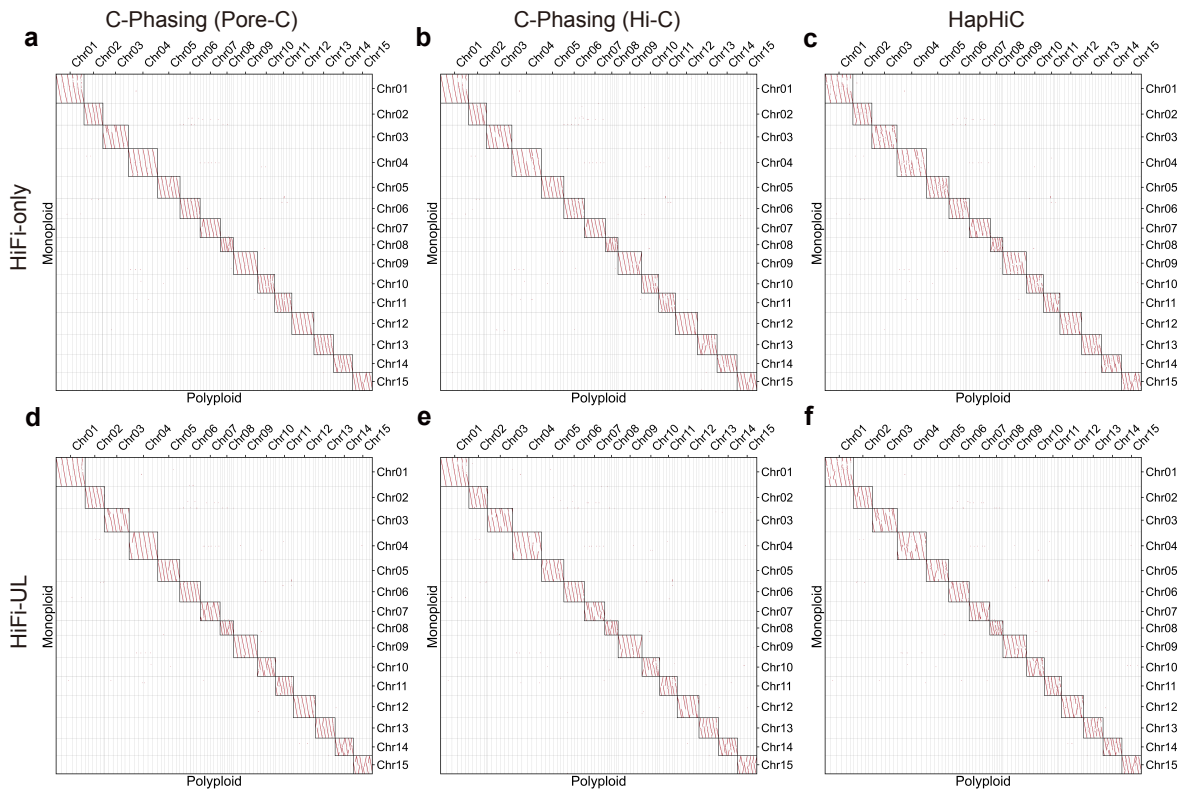

**Supplementary Fig. 16 | Syntenic dot plots of sweet potato assemblies generated by different scaffolding strategies, used to benchmark chromosome-scale assembly accuracy on real data.**

**Supplementary Fig. 17 | Heatmaps of sweet potato Pore-C or Hi-C contact maps at 500 kb resolution for benchmarking chromosome-scale assembly performance using real data.**

*(included in separate PDF file)*

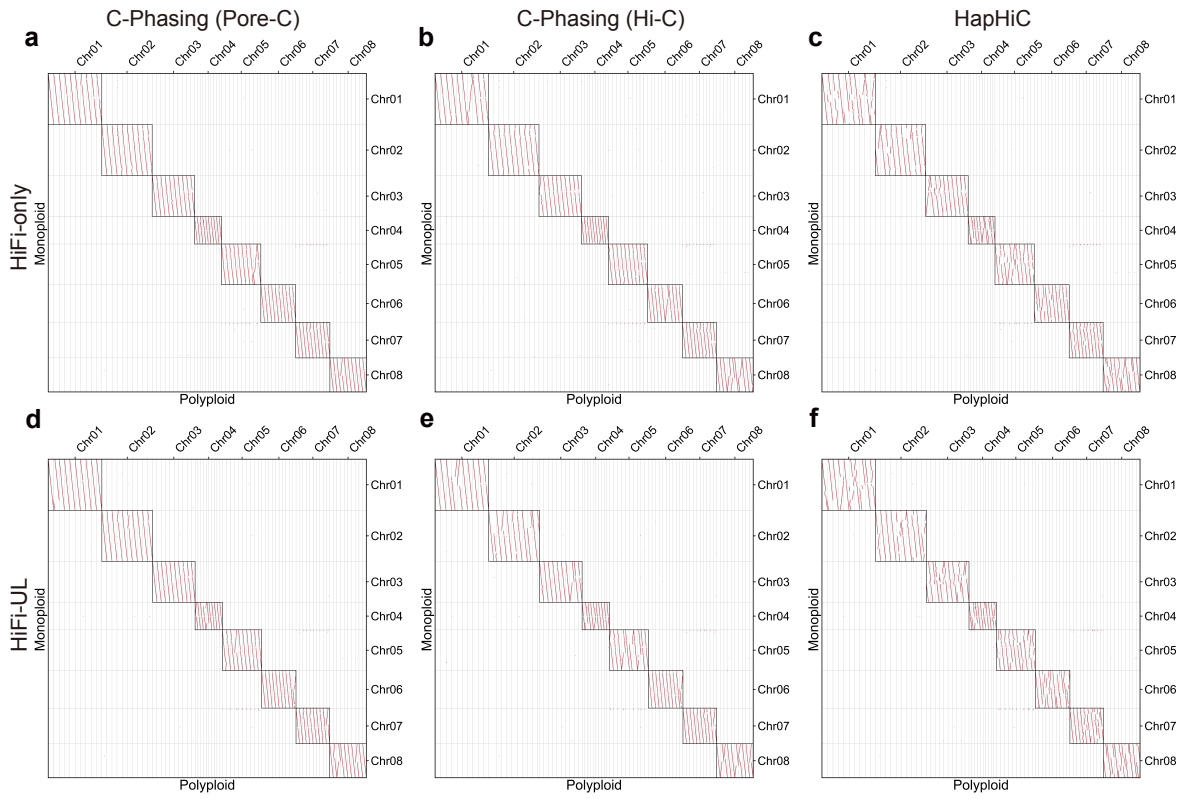

**Supplementary Fig. 18 | Syntenic dot plots of wild sugarcane assemblies generated by different scaffolding strategies, used to benchmark chromosome-scale assembly accuracy on real data.**

**Supplementary Fig. 19 | Heatmaps of wild sugarcane Pore-C or Hi-C contact maps at 1 Mb resolution for benchmarking chromosome-scale assembly performance using real data.**

*(included in separate PDF file)*

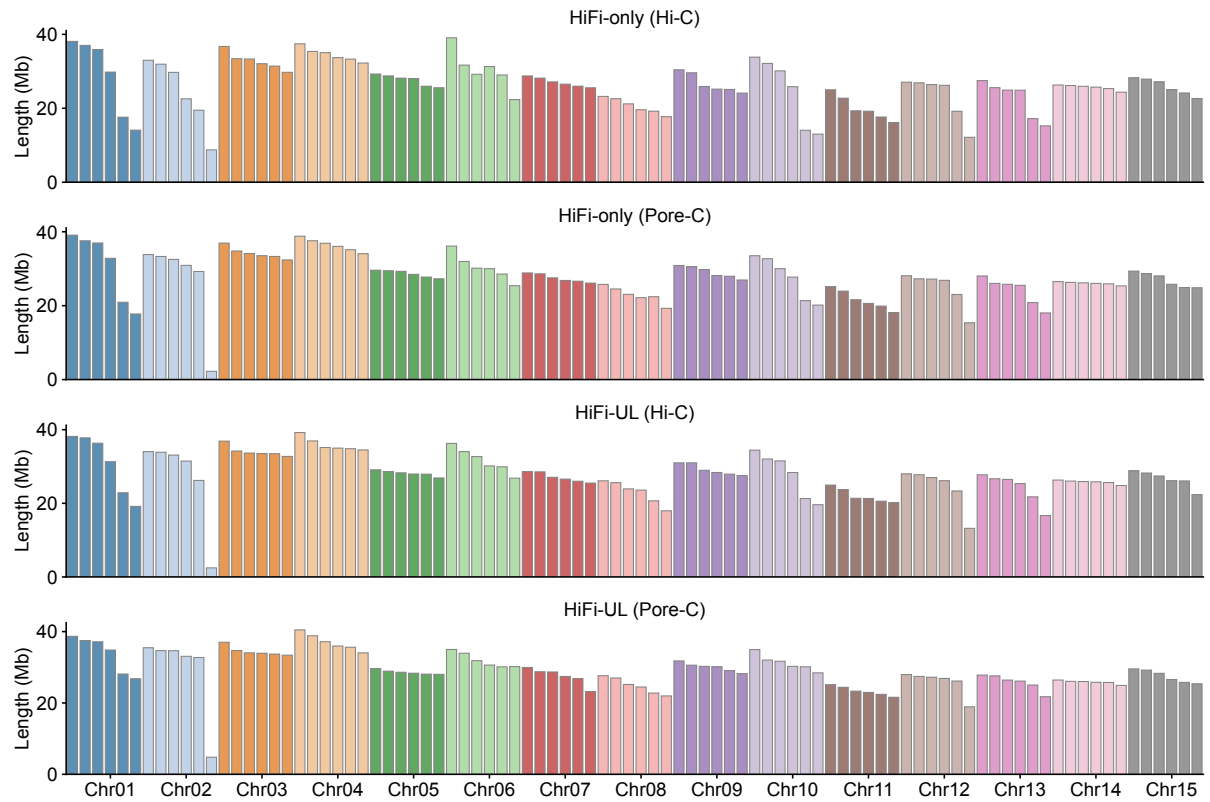

**Supplementary Fig. 20 | Comparison of the scaffold length between C-Phasing (Hi-C) and C-Phasing (Pore-C).** Note: these assemblies were generated by C-Phasing on all Hi-C data or 125x Pore-C data.

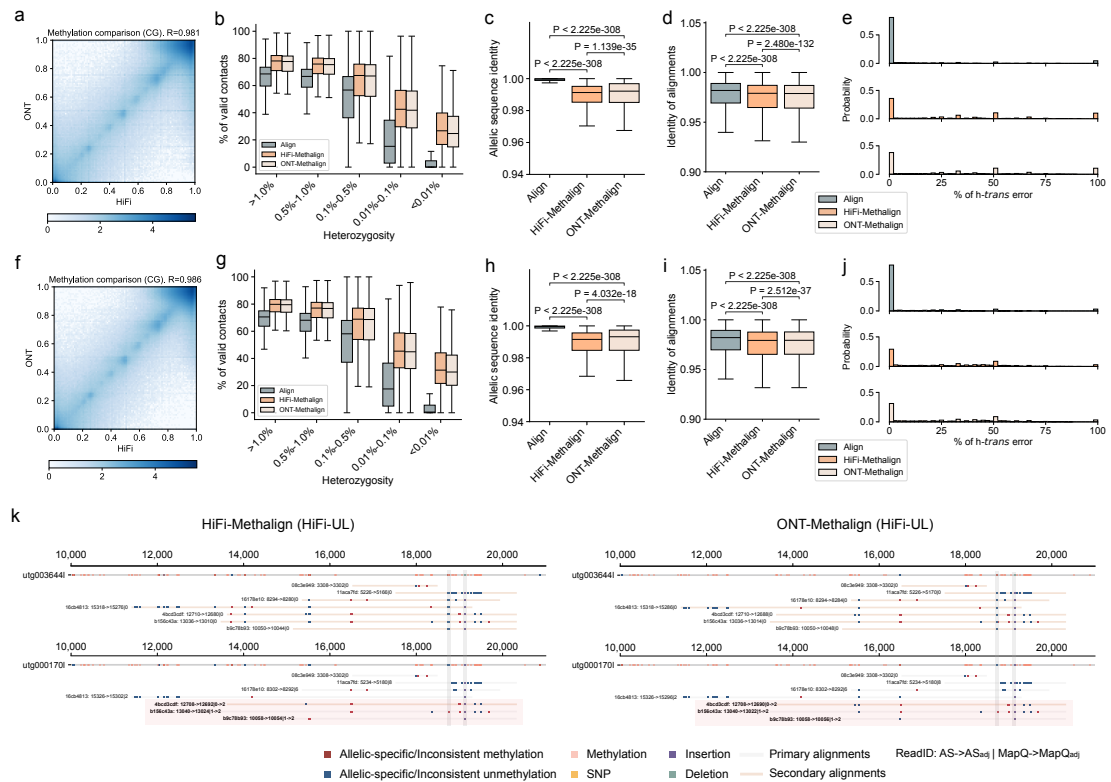

**Supplementary Fig. 21 | Comparative analysis of Pore-C alignments processed using Align and Methalign.**

The analyses were performed on two assemblies of sweet potato: HiFi-only (**a-e**) and HiFi-UL (**f-j**). **a, f**, Comparison of 5mCG methylation detection between PacBio HiFi and ONT data across the genome. **b, g**, Proportion of valid contacts derived from Align and Methalign across genomic regions with varying levels of heterozygosity. **c, h**, Sequence identity between allelic contigs as evaluated using Align and Methalign. **d, i**, Read-to-contig alignment identity comparison between Align and Methalign. **e, j**, Statistics of *h-trans* contact errors. **k**, Read pileup plot of an allelic contig pair, illustrating how Methalign refines ambiguous alignments.

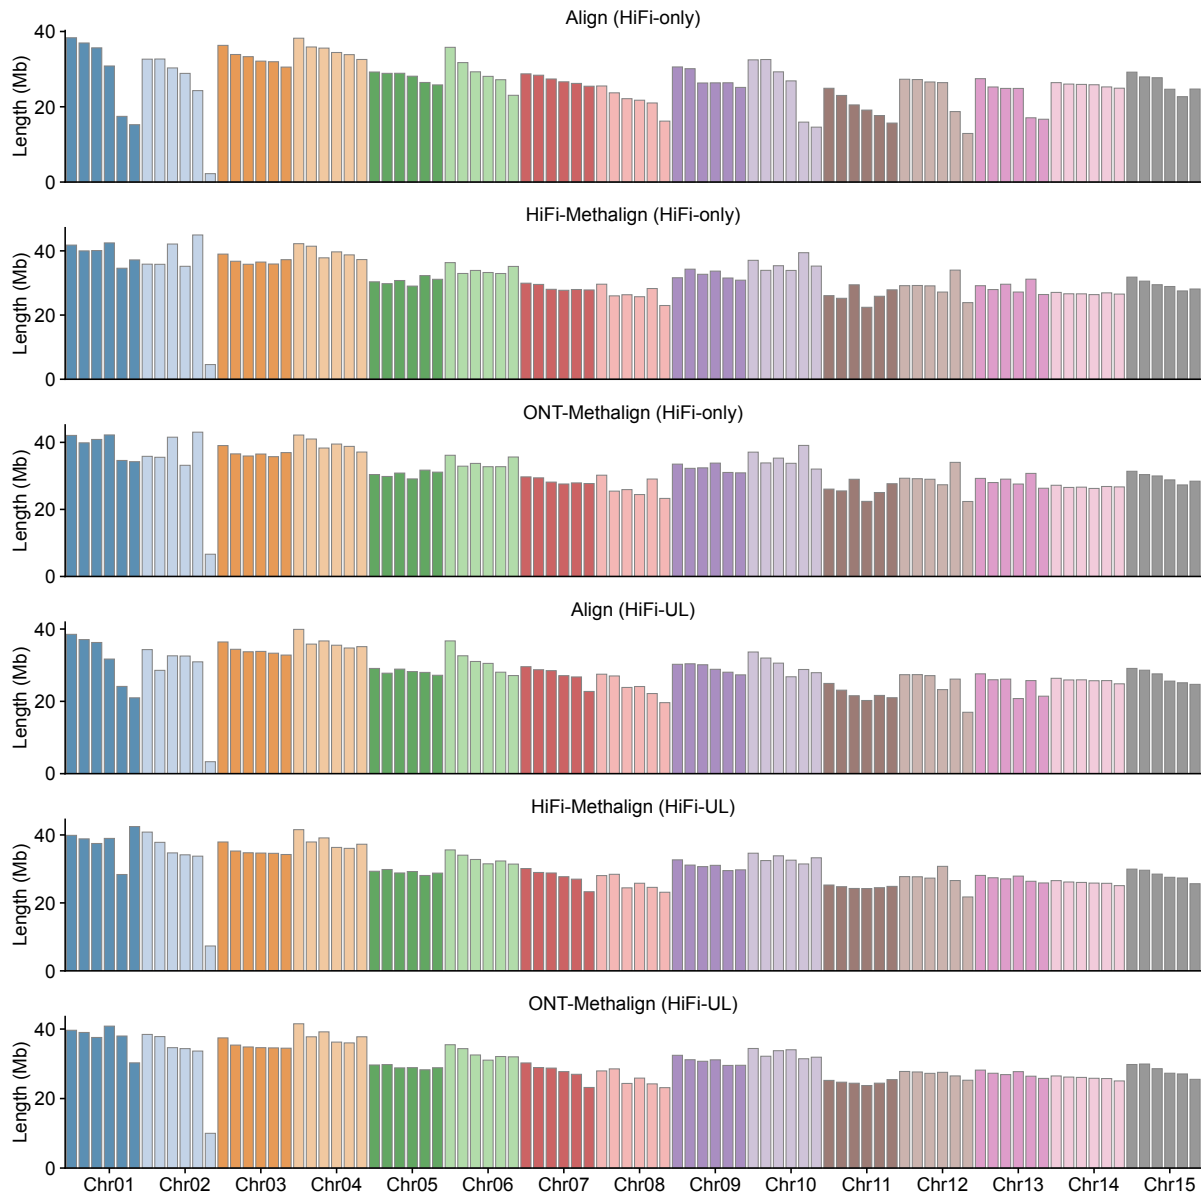

**Supplementary Fig. 22 | Comparison of the scaffold length between Align and Methalign.** Note: these assemblies were generated by C-Phasing on 50x Pore-C data.

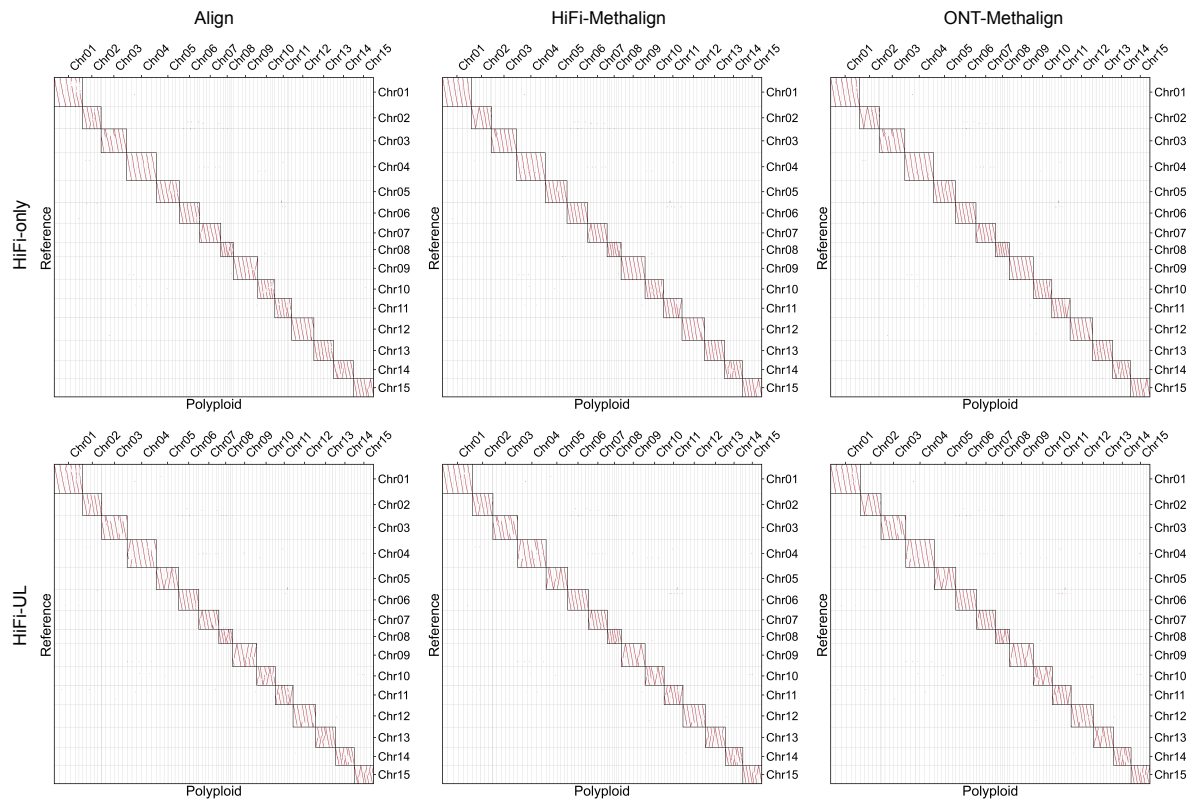

**Supplementary Fig. 23 | Synteny dot plots of the sweet potato for using Align or Methalign results.** Note: these assemblies were generated by C-Phasing on 50x Pore-C data.

**Supplementary Fig. 24 | Heatmaps of cultivated sugarcane ZZ01 Pore-C or Hi-C contact maps at 1 Mb resolution.** *(included in separate PDF file)*
